# Supplementary material for: A simple and efficient copper-catalyzed three-component reaction to synthesize (Z)-1,2-dihydro-2-iminoquinolines
Source: Royal Society of Chemistry journal article supplement (doi:10.1039/d1ra06330h), 2021-01-01
Supplement: d1ra06330h1.pdf [file d1ra06330h1.pdf]

## Supporting Online Material for

# A simple and efficient copper-catalyzed three-component reaction to synthesize (*Z*)-1, 2-dihydro-2-iminoquinolines

Xiai Luo,<sup>a,b,c</sup> Yu Zhao,<sup>a</sup> Susu Tao,<sup>a</sup> Zhong-Tao Yang,<sup>a,b</sup> Hui Luo<sup>\*a,b,d</sup> and Weiguang Yang<sup>\*a,b,d</sup>

<sup>a</sup> Guangdong Key Laboratory for Research and Development of Natural Drugs, The Marine Biomedical Research Institute, Guangdong Medical University, Zhanjiang, 524023, China.

<sup>b</sup> The Marine Biomedical Research Institute of Guangdong Zhanjiang, Zhanjiang, Guangdong, 524023, China.

<sup>c</sup> Department of Pharmacy, Hunan University of Medicine, Huaihua 418000, China

<sup>d</sup> Southern Marine Science and Engineering Guangdong Laboratory (Zhanjiang), Zhanjiang, Guangdong, 524023, China.

Email: luohui@gdmu.edu.cn; 09ywg@163.com

## Table of Contents

|                                                                                            |     |
|--------------------------------------------------------------------------------------------|-----|
| 1. The structures of starting materials <b>1a-1i</b> , <b>2a-2g</b> and <b>3a-4i</b> ..... | S2  |
| 2. General information.....                                                                | S3  |
| 3. NMR Spectra.....                                                                        | S4  |
| 4. X-ray Crystallographic Data for Compound <b>4a</b> , <b>4s</b> and <b>4w</b> .....      | S28 |

1. The structures of starting materials **1a-1i**, **2a-2g** and **3a-3i**.

### Structures of the starting materials 1a-1i

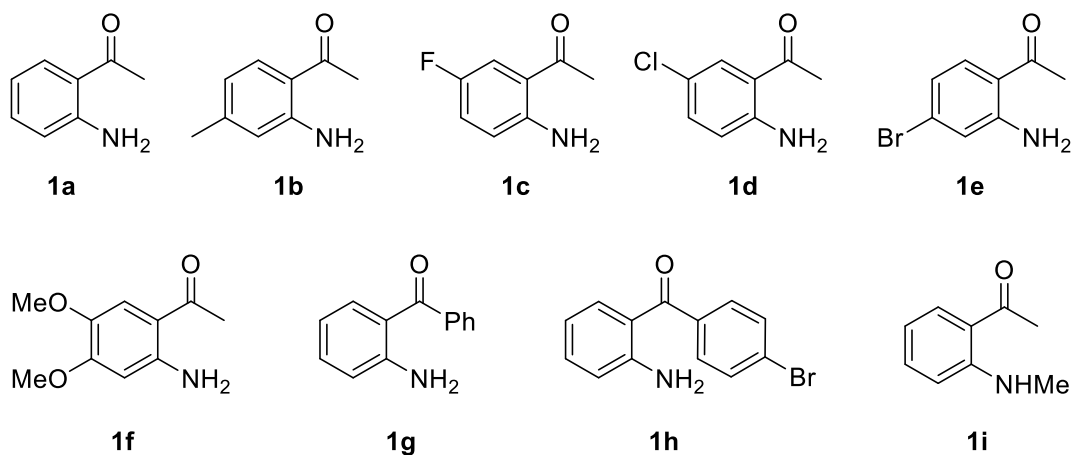

### Structures of the starting materials 2a-2g

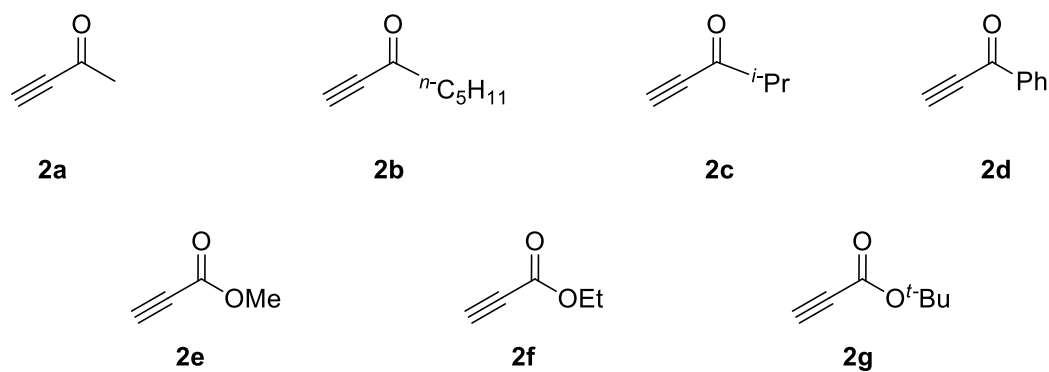

### Structures of the starting materials 3a-3i

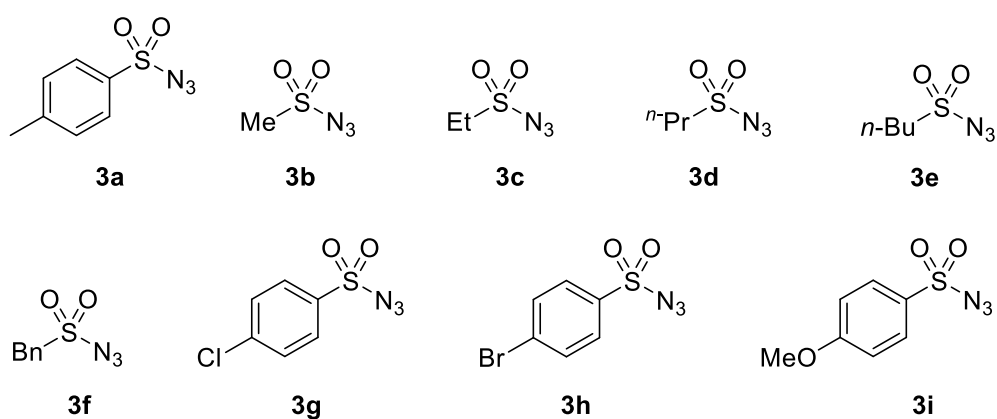

## 2. General Information

$^1\text{H}$  and  $^{13}\text{C}\{^1\text{H}\}$  NMR spectra were recorded at ambient temperatures on a 400 MHz Bruker spectrometer using  $\text{CDCl}_3$  or  $\text{DMSO-}d_6$  as solvent and tetramethylsilane (TMS) as the internal standard. Chemical shifts are presented as  $\delta$  values relative to TMS and  $^1\text{H}$ - $^1\text{H}$  coupling constants ( $J$  values) are given in Hz. IR spectra were recorded as KBr pellets on a Nicolet FT-IR 5DX spectrometer while HRMS measurements were carried out on a Bruker micrOTOF-Q II spectrometer. Melting points were determined on a Yanaco melting point apparatus and are uncorrected.

### 3. NMR Spectra

#### *N*-(3-acetyl-4-methylquinolin-2(1*H*)-ylidene)-4-methylbenzenesulfonamide (4a)

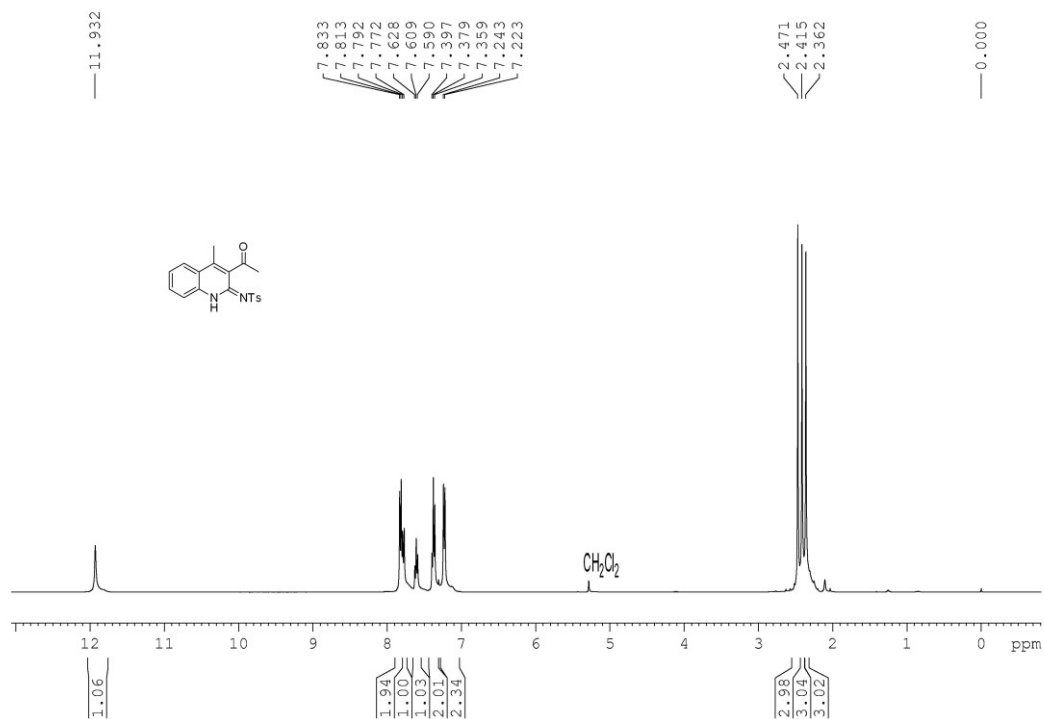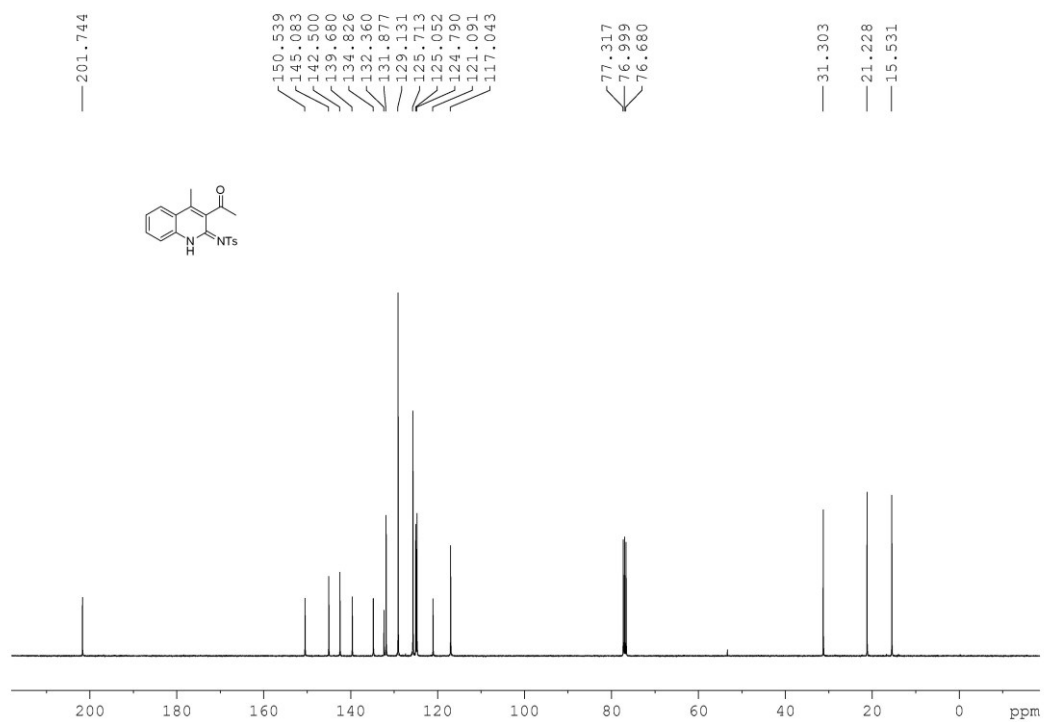

***N*-(3-acetyl-4,7-dimethylquinolin-2(1*H*)-ylidene)-4-methylbenzenesulfonamide**

**(4b)**

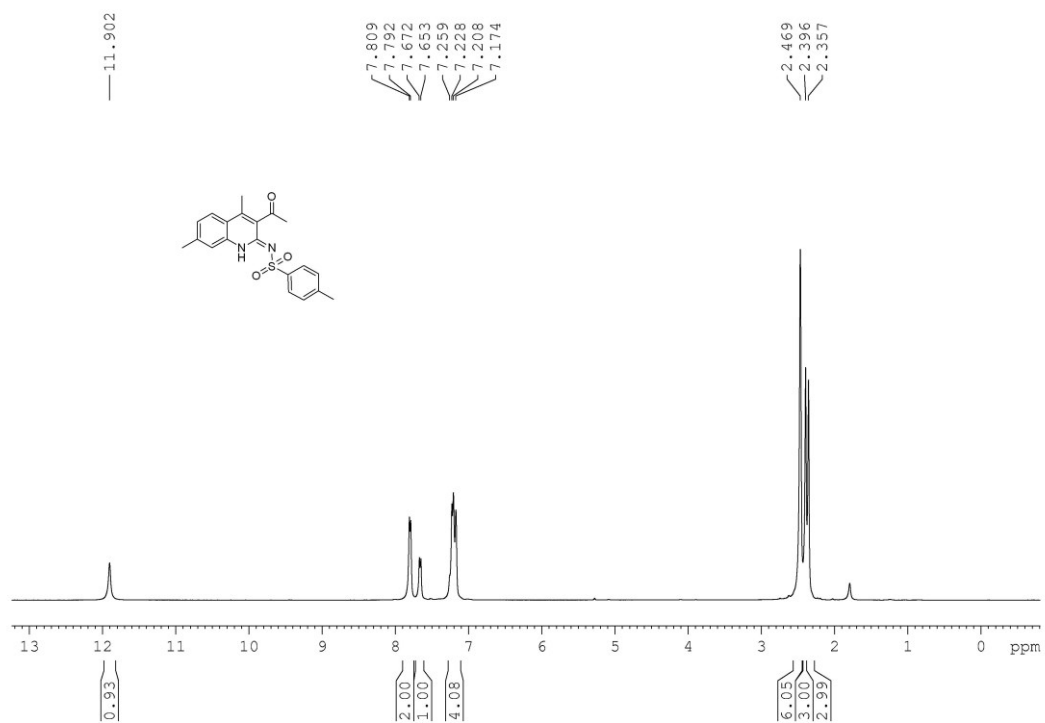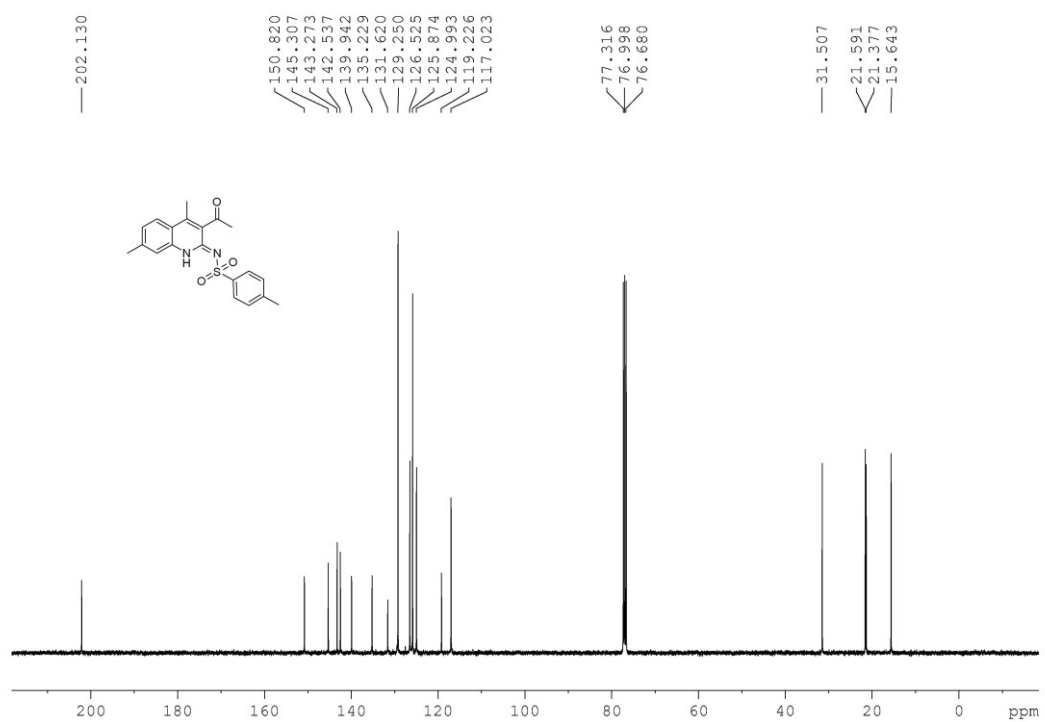

***N*-(3-acetyl-6-fluoro-4-methylquinolin-2(1*H*))-ylidene)-4-methylbenzenesulfonamide (4c)**

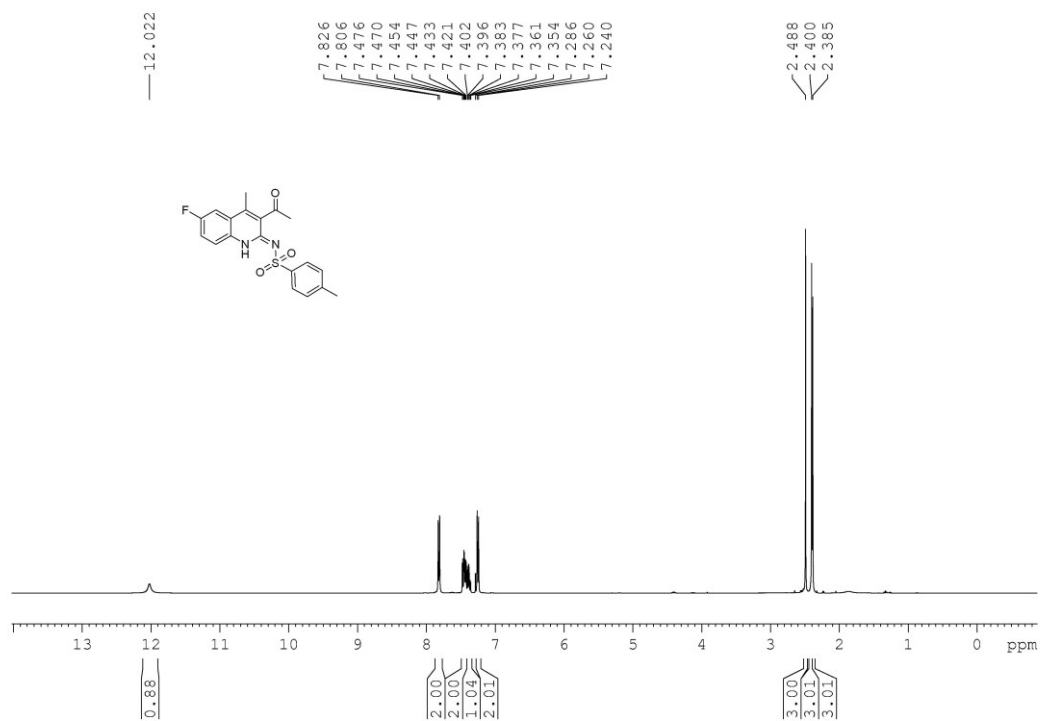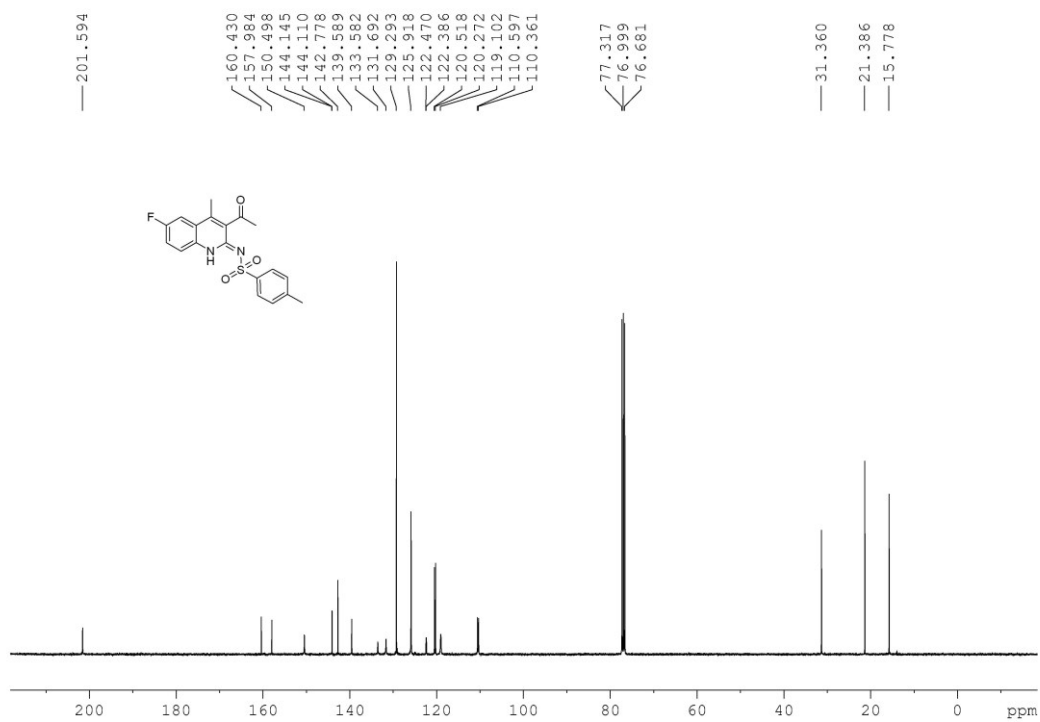

***N*-(3-acetyl-6-chloro-4-methylquinolin-2(1*H*)-ylidene)-4-methylbenzenesulfonamide (4d)**

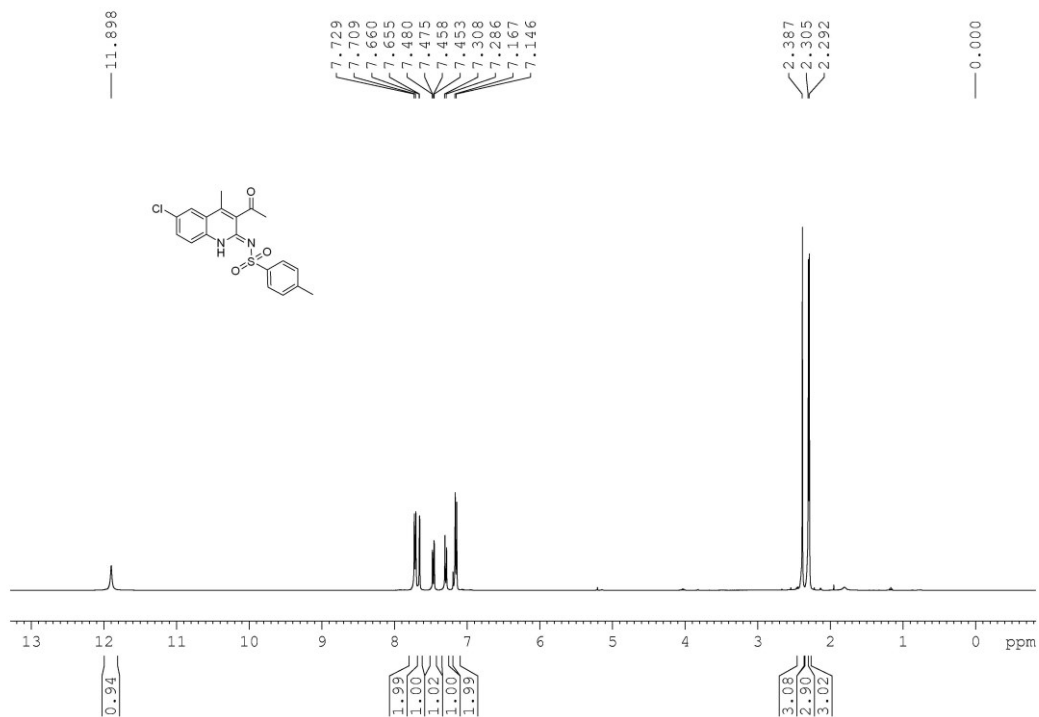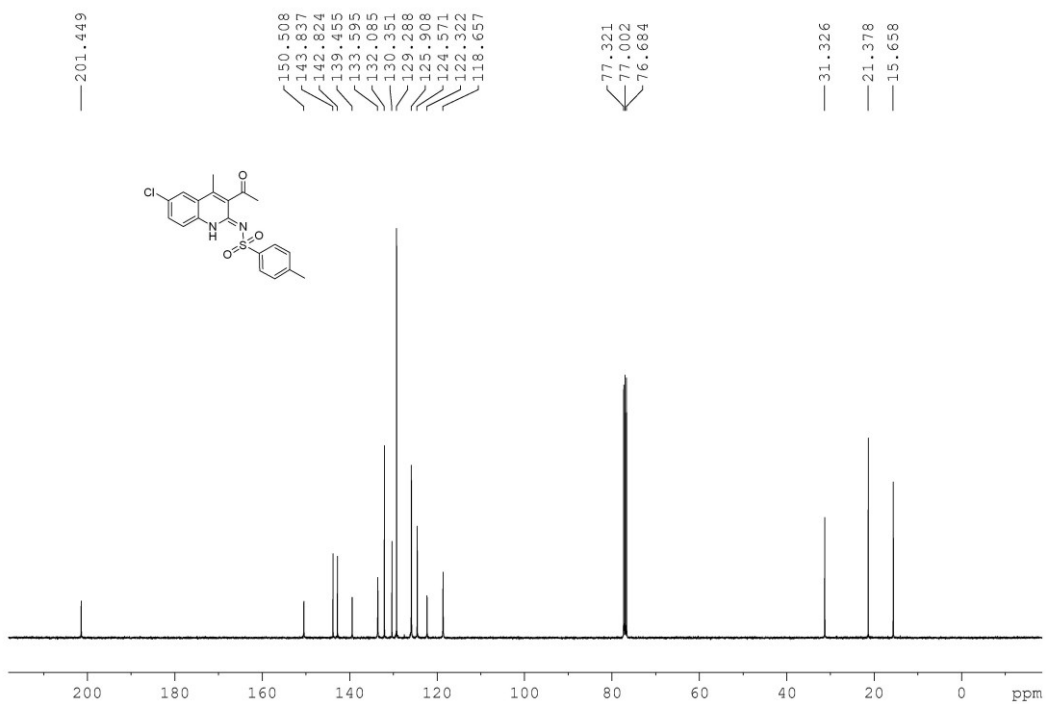

***N*-(3-acetyl-7-bromo-4-methylquinolin-2(1*H*)-ylidene)-4-methylbenzenesulfonamide (4e)**

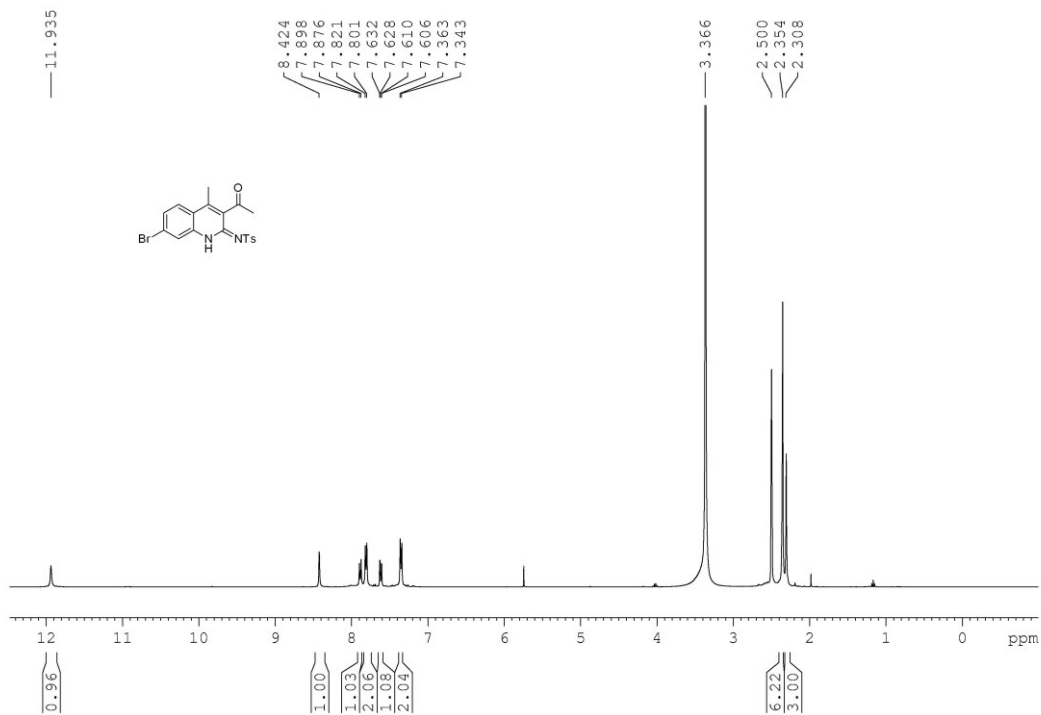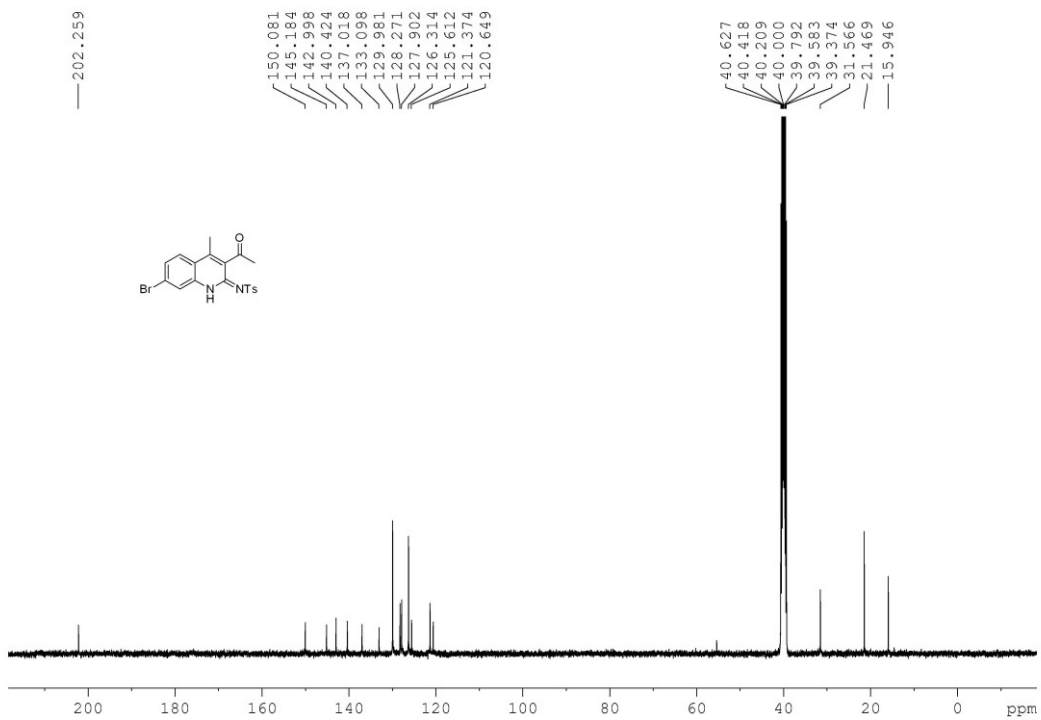



***N*-(3-acetyl-6,7-dimethoxy-4-methylquinolin-2(1*H*)-ylidene)-4-methylbenzenesulfonamide (4f)**

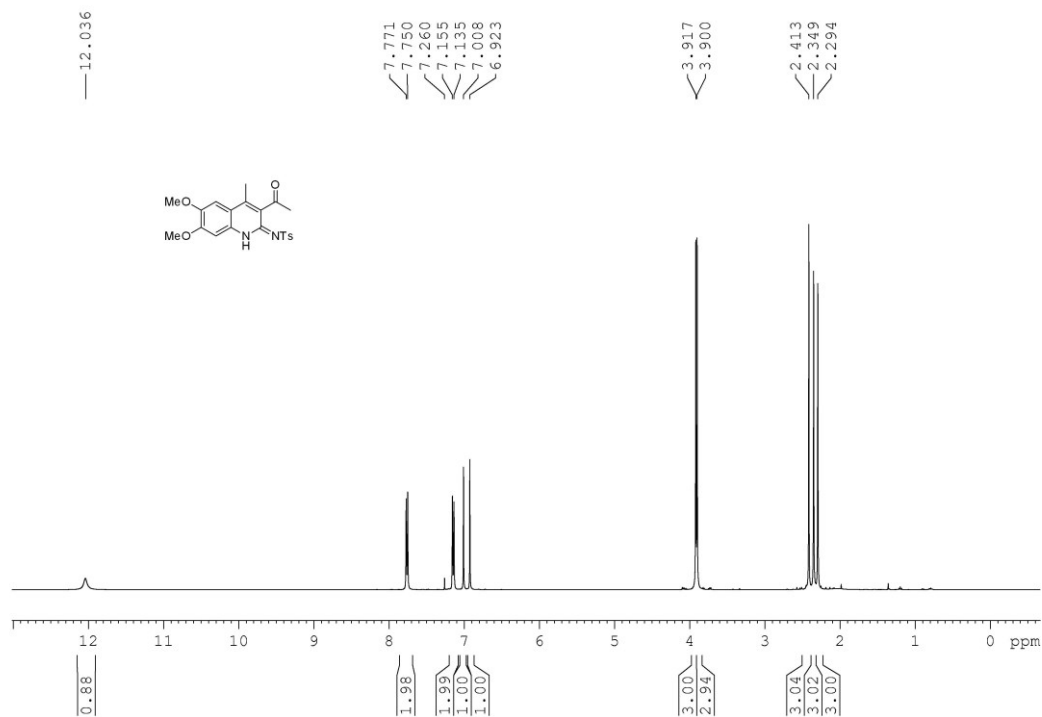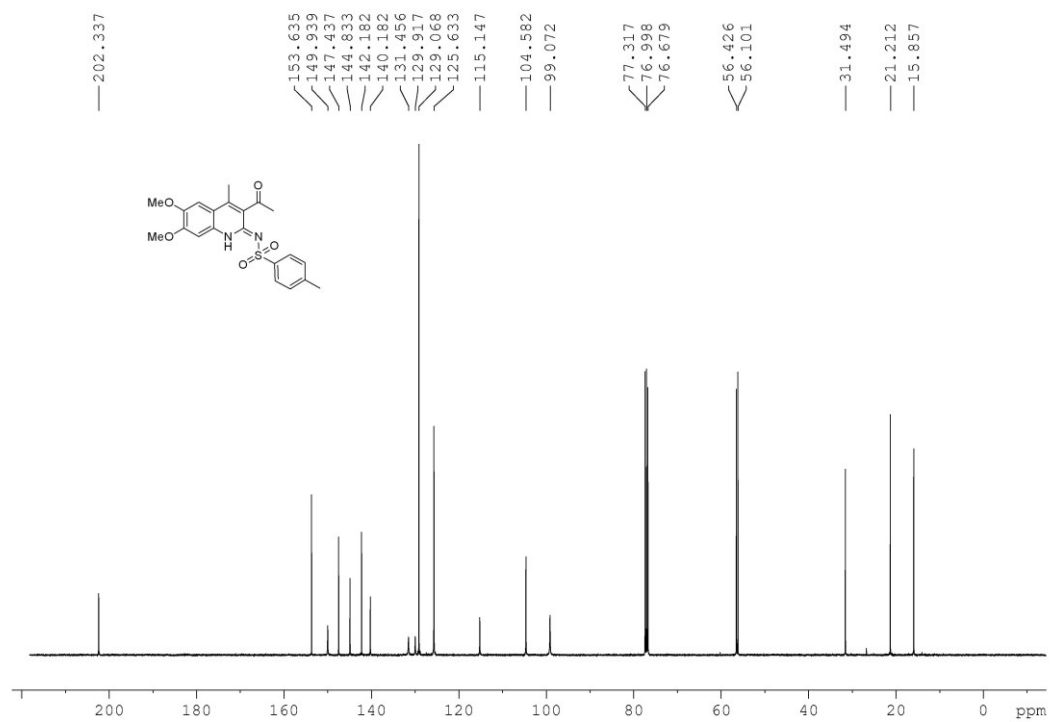

***N*-(3-acetyl-4-phenylquinolin-2(1*H*)-ylidene)-4-methylbenzenesulfonamide (4g)**

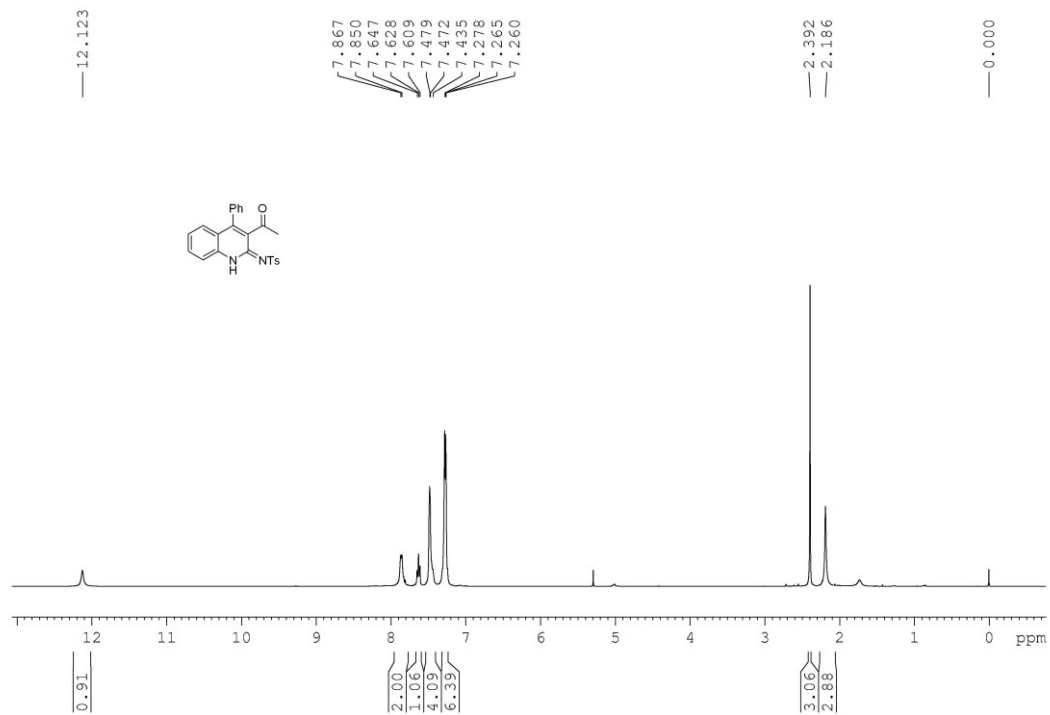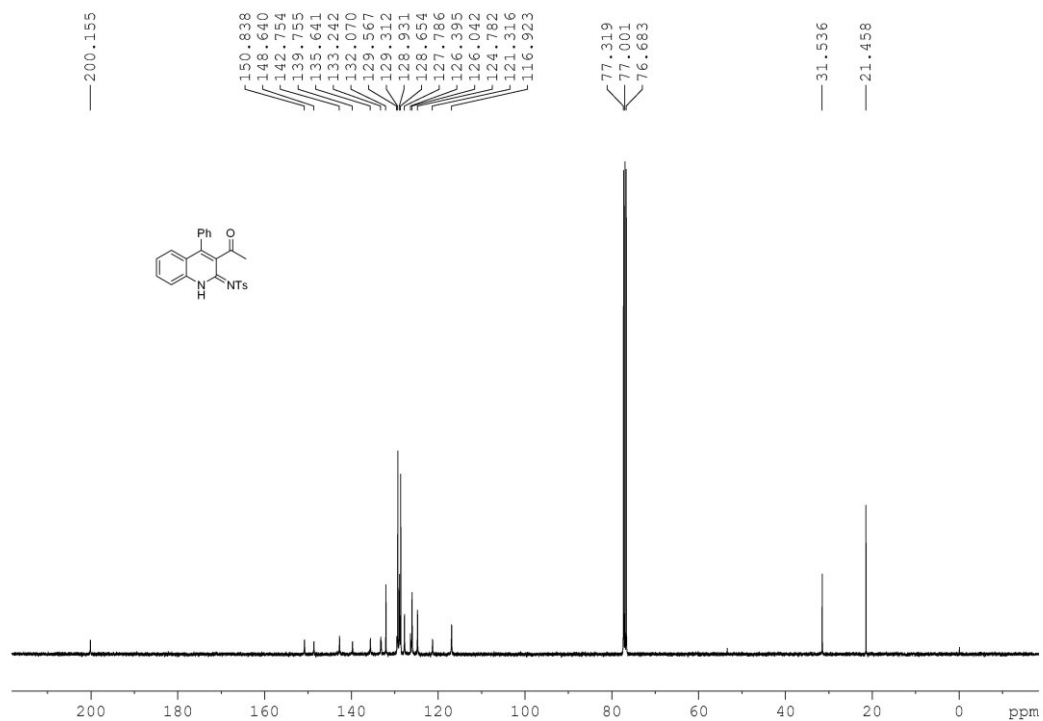

***N*-(3-acetyl-4-(4-bromophenyl)quinolin-2(1*H*)-ylidene)-4-methylbenzenesulfonamide (4h)**

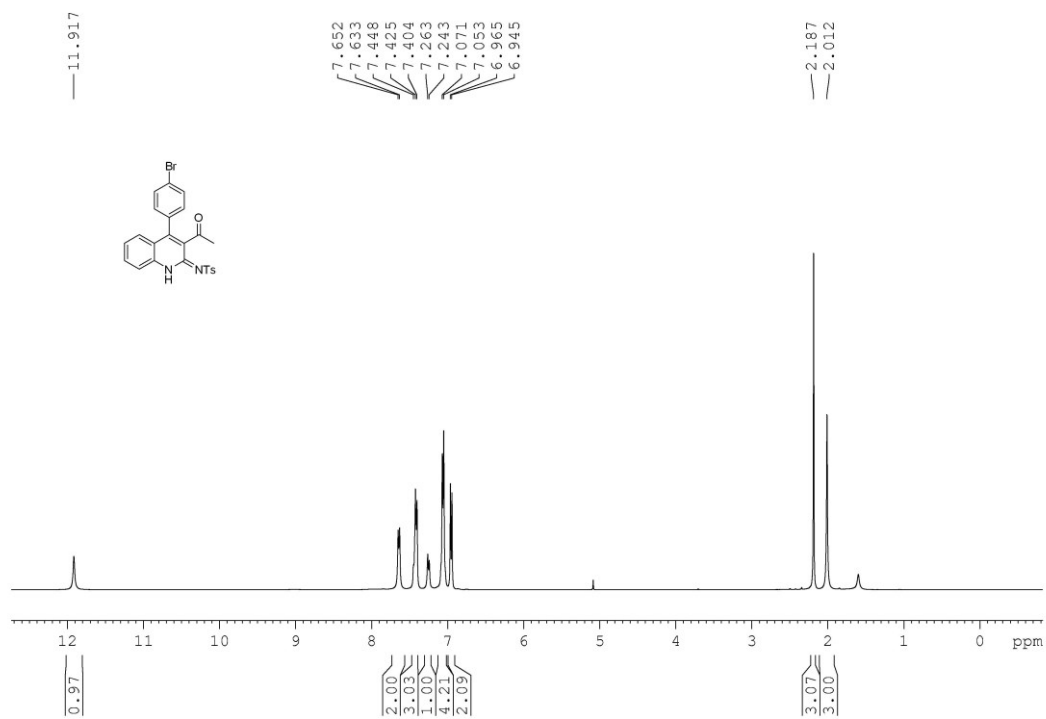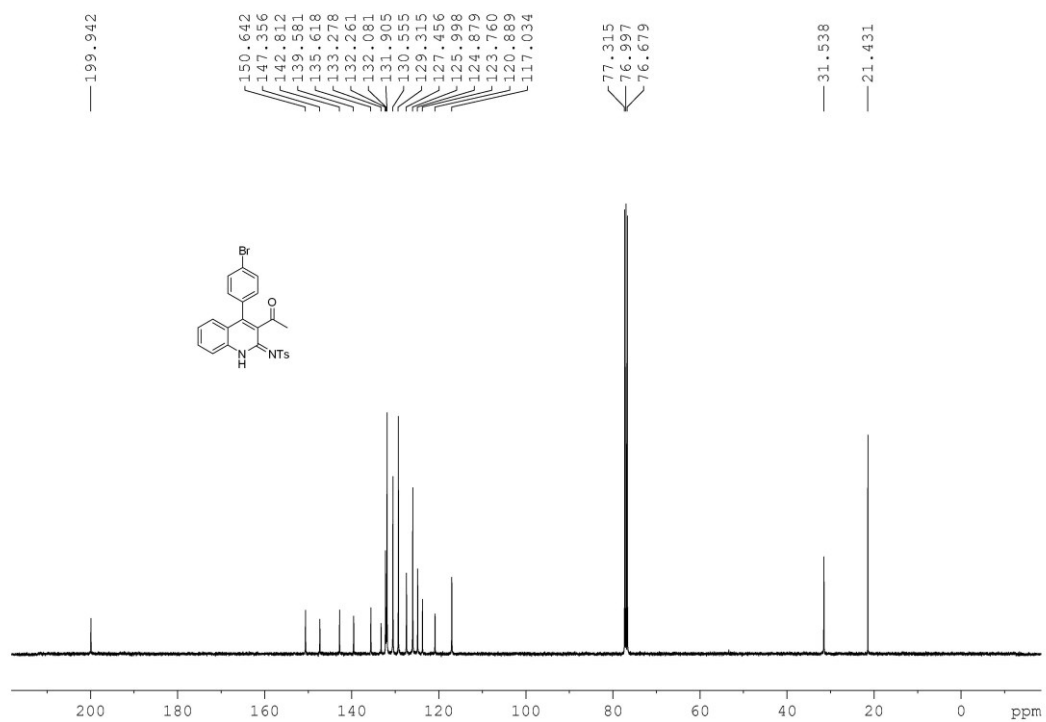

***N*-(3-hexanoyl-4-methylquinolin-2(1*H*)-ylidene)-4-methylbenzenesulfonamide**

**(4i)**

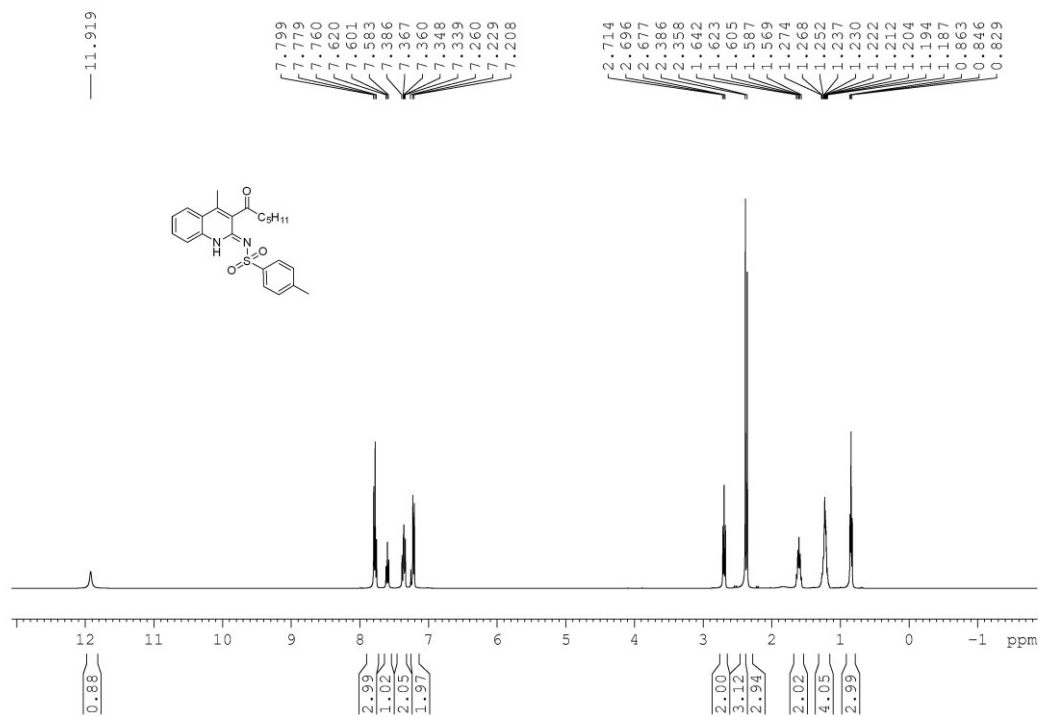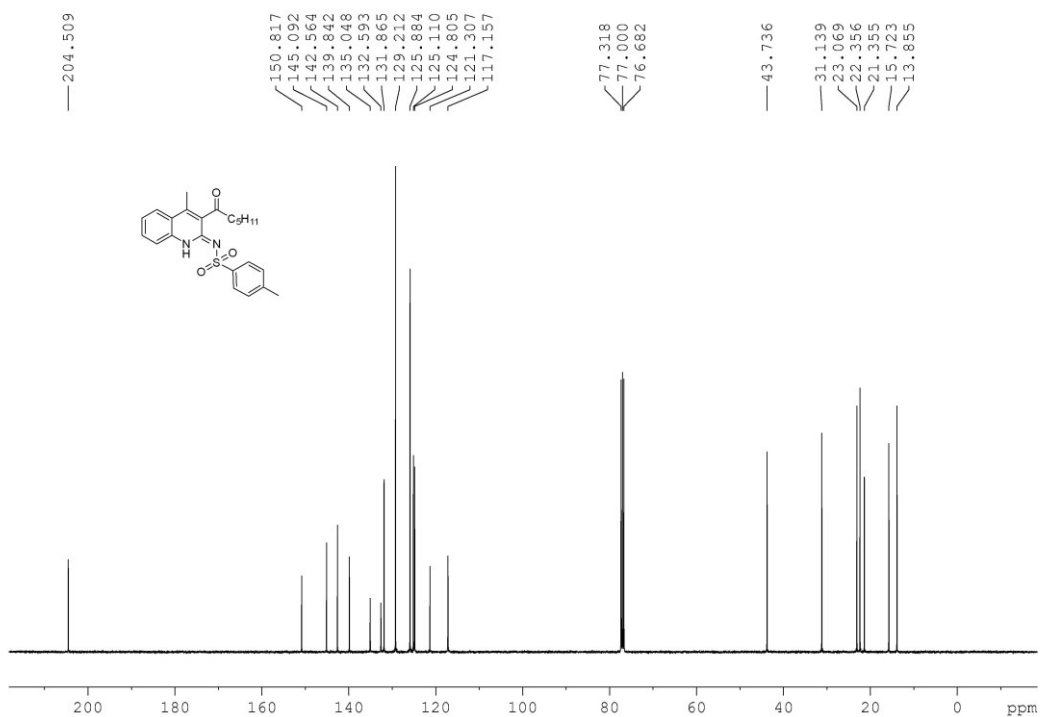

***N*-(3-isobutyryl-4-methylquinolin-2(1*H*)-ylidene)-4-methylbenzenesulfonamide**

**(4j)**

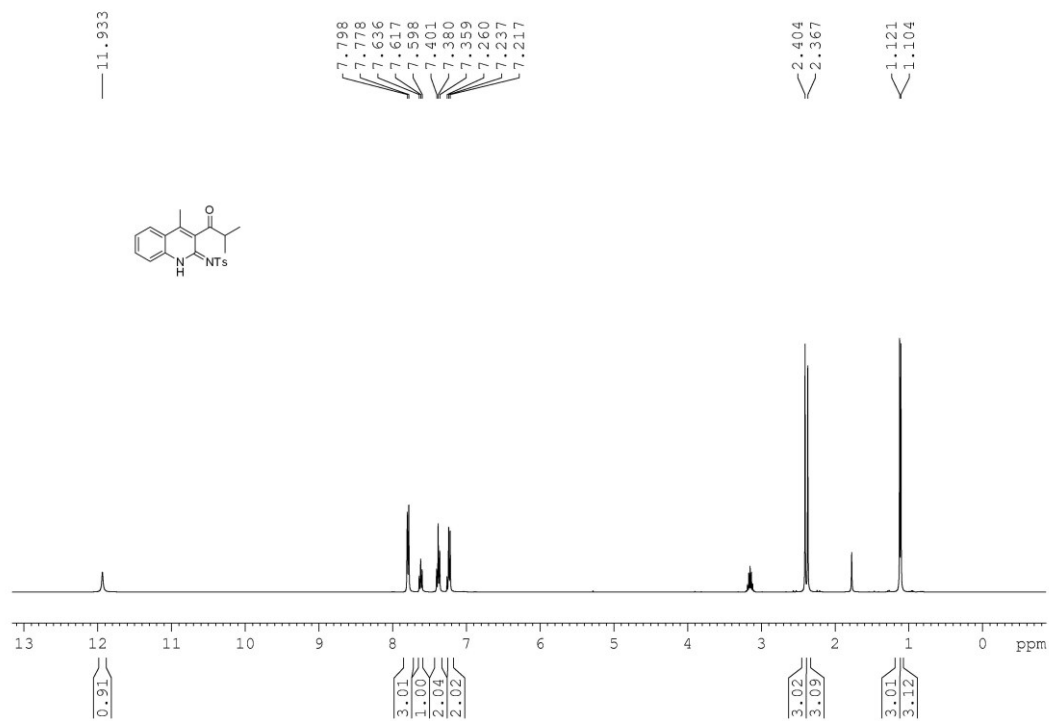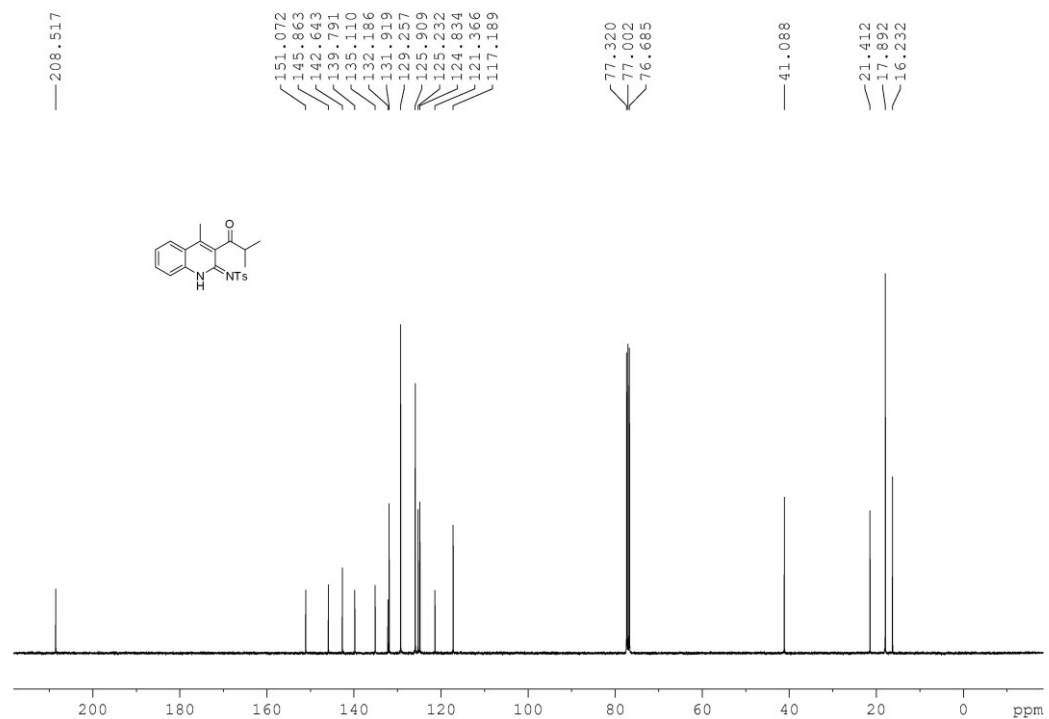

***N*-(3-benzoyl-4-methylquinolin-2(1*H*))-ylidene)-4-methylbenzenesulfonamide  
(4k)**

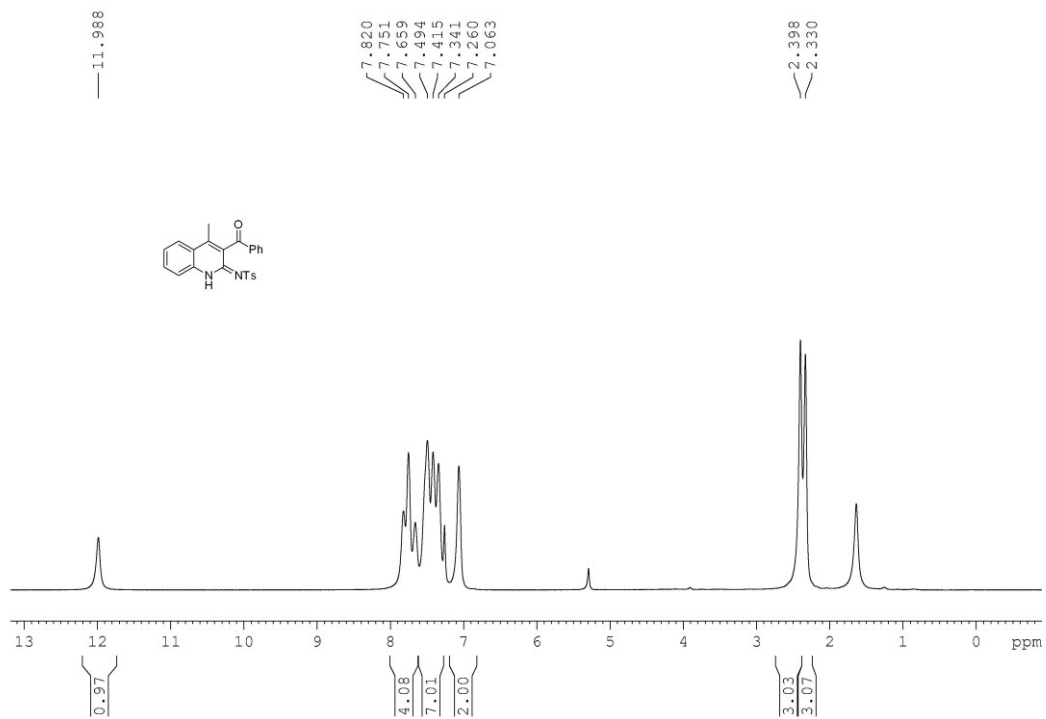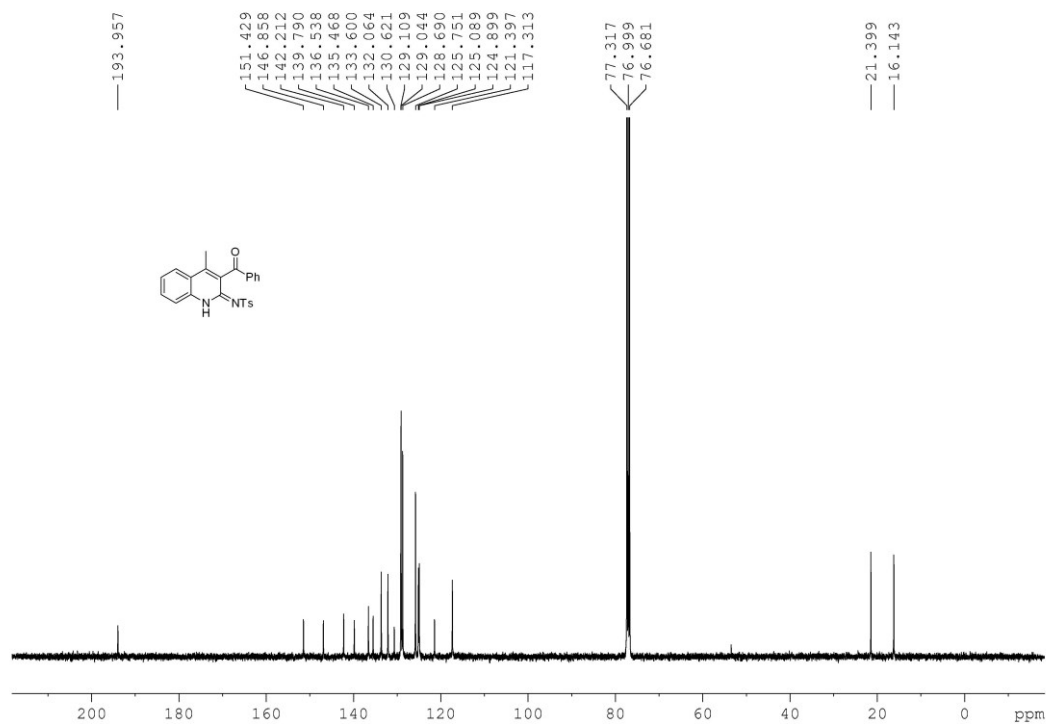

**methyl 4-methyl-2-(tosylimino)-1,2-dihydroquinoline-3-carboxylate (4l)**

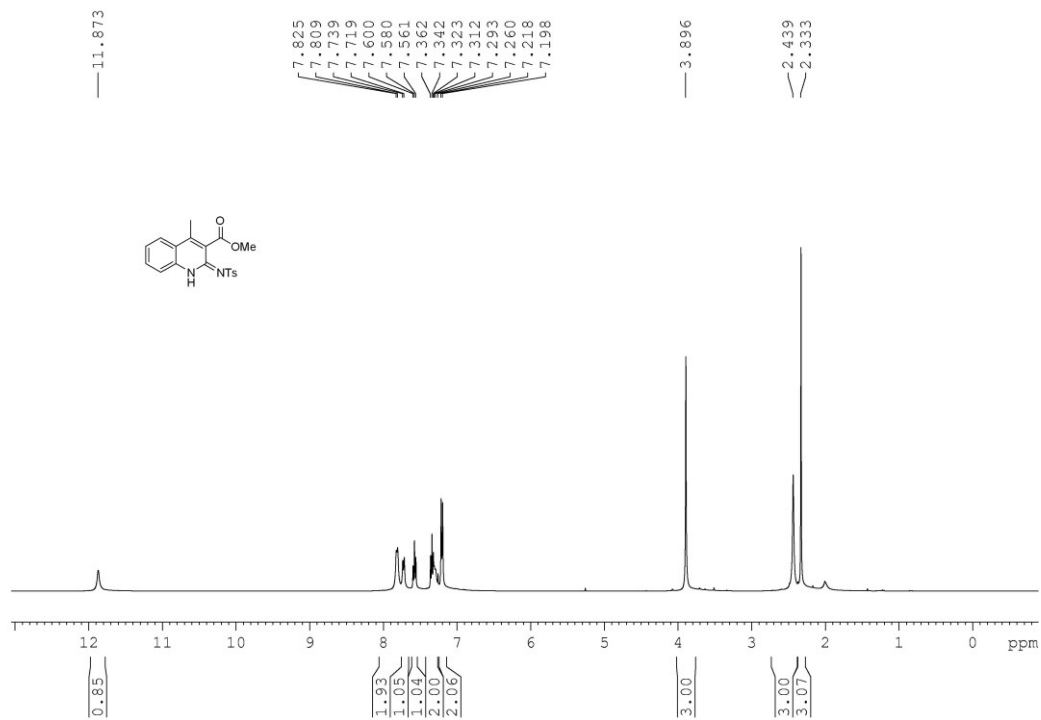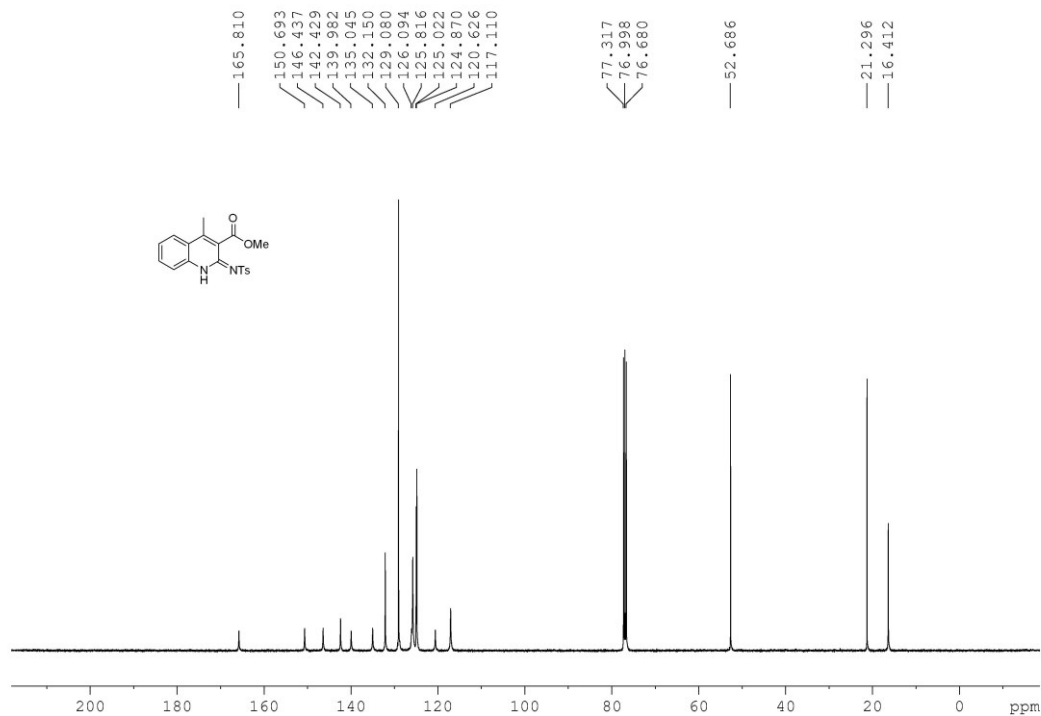

**ethyl 4-methyl-2-(tosylimino)-1,2-dihydroquinoline-3-carboxylate (4m)**

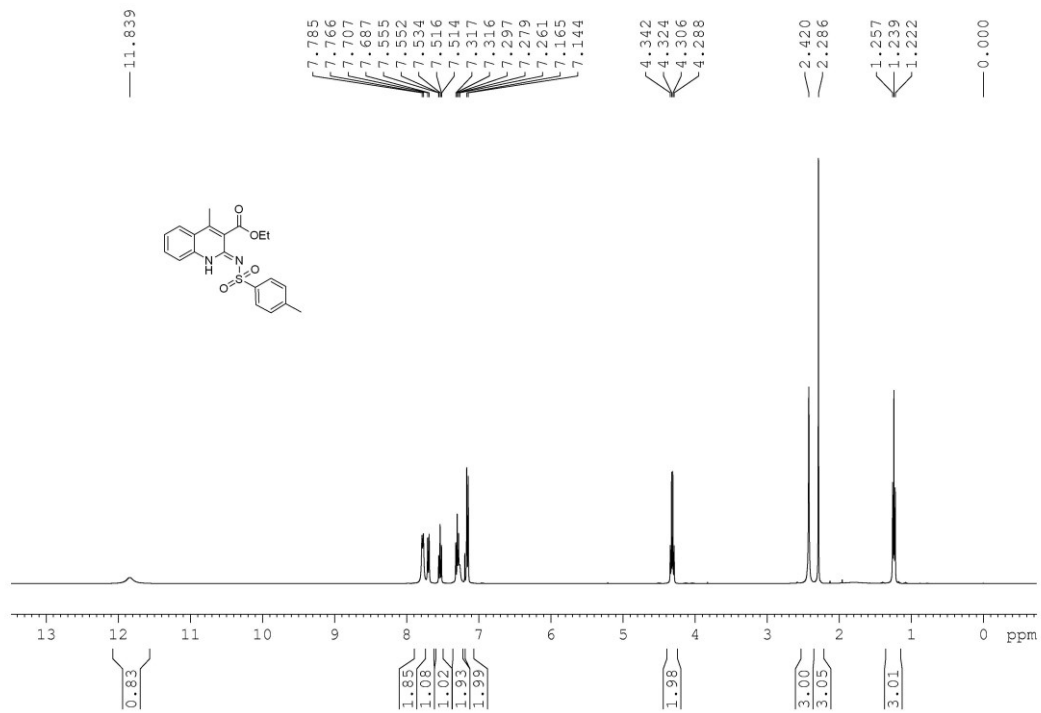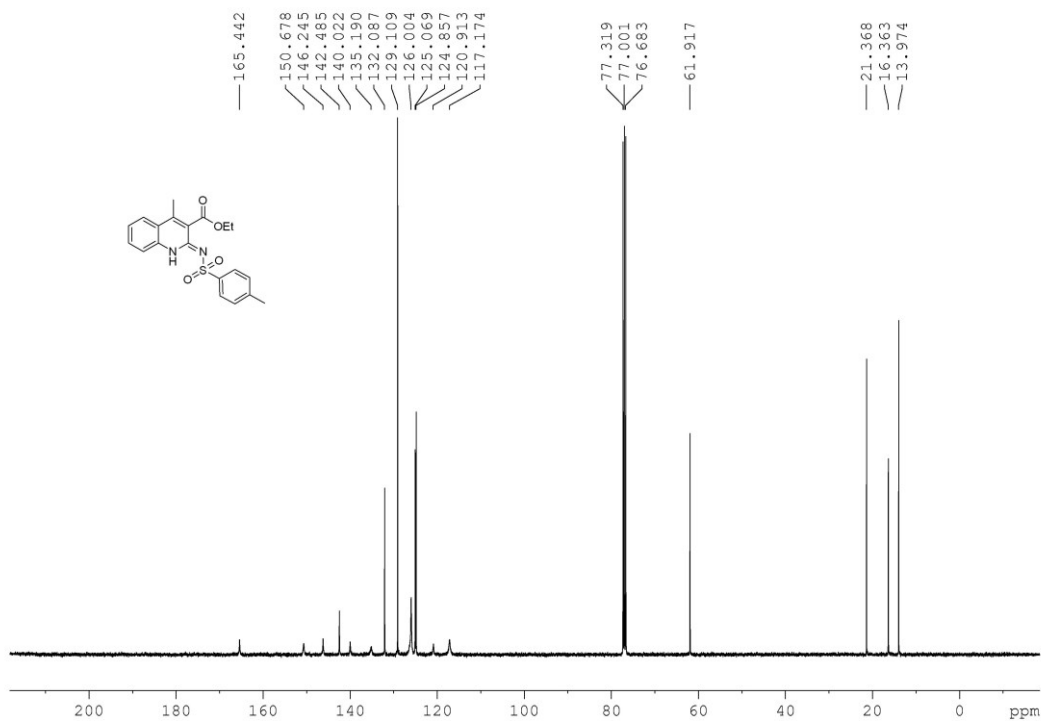



**tert-butyl 4-methyl-2-(tosylimino)-1,2-dihydroquinoline-3-carboxylate (4n)**

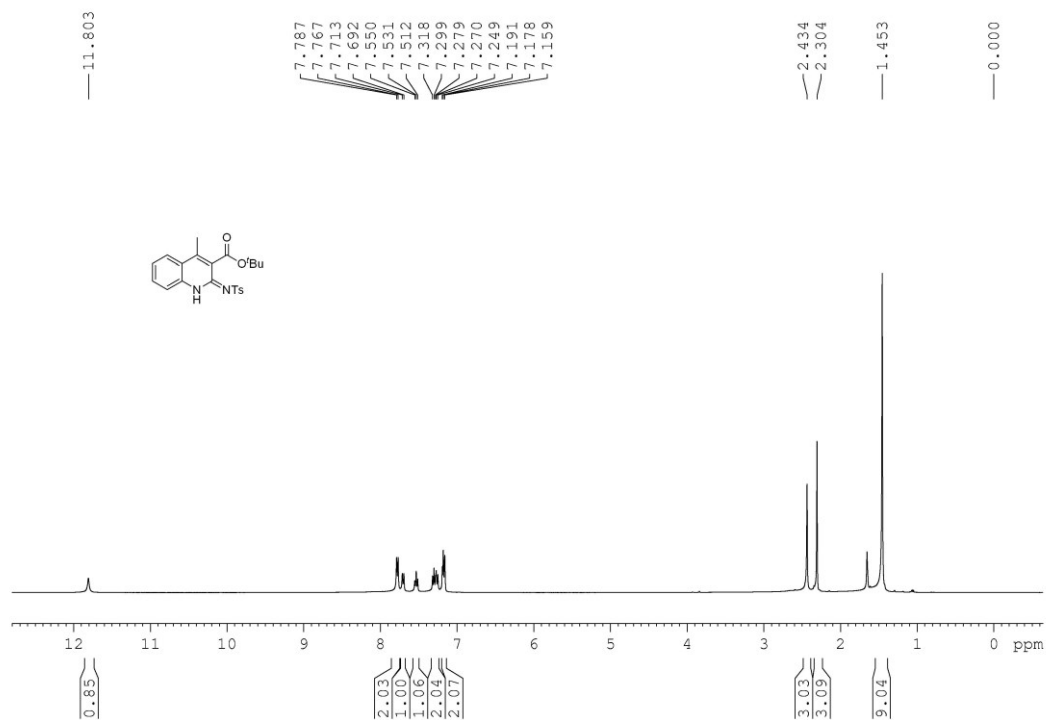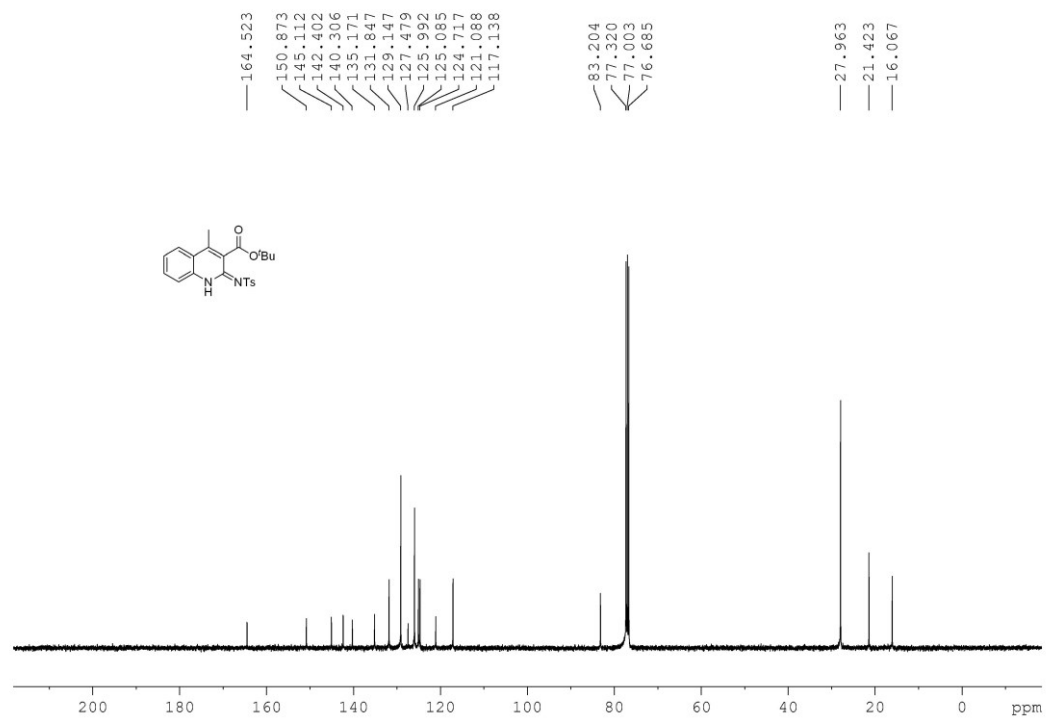

**(E)-N-(3-acetyl-4-methylquinolin-2(1H)-ylidene)methanesulfonamide (4o)**

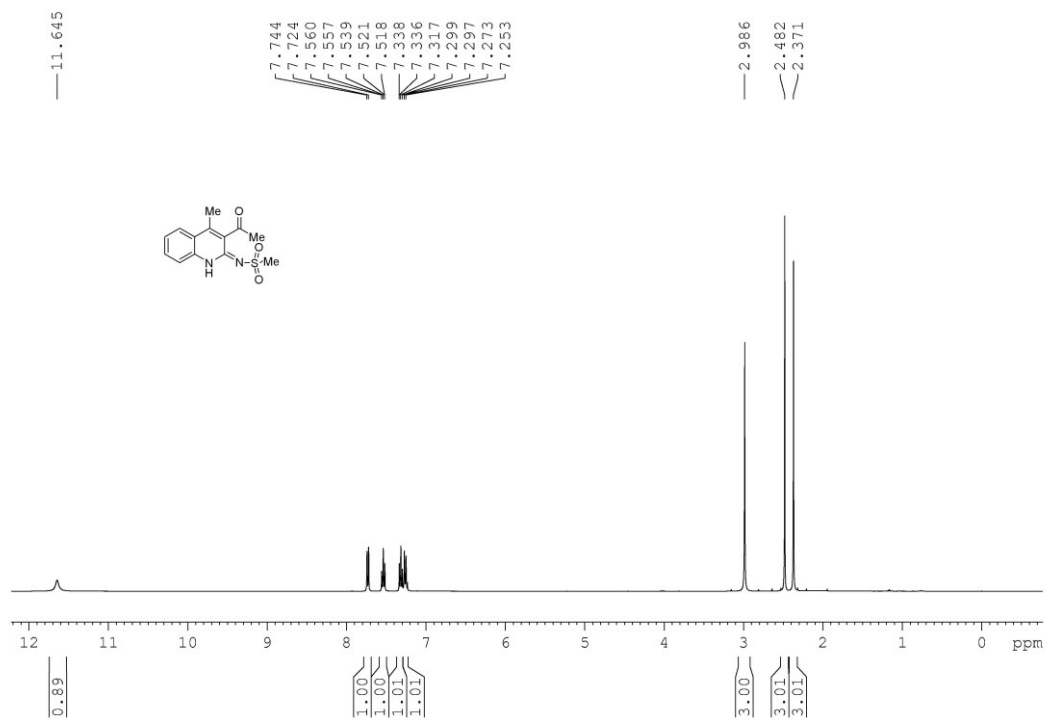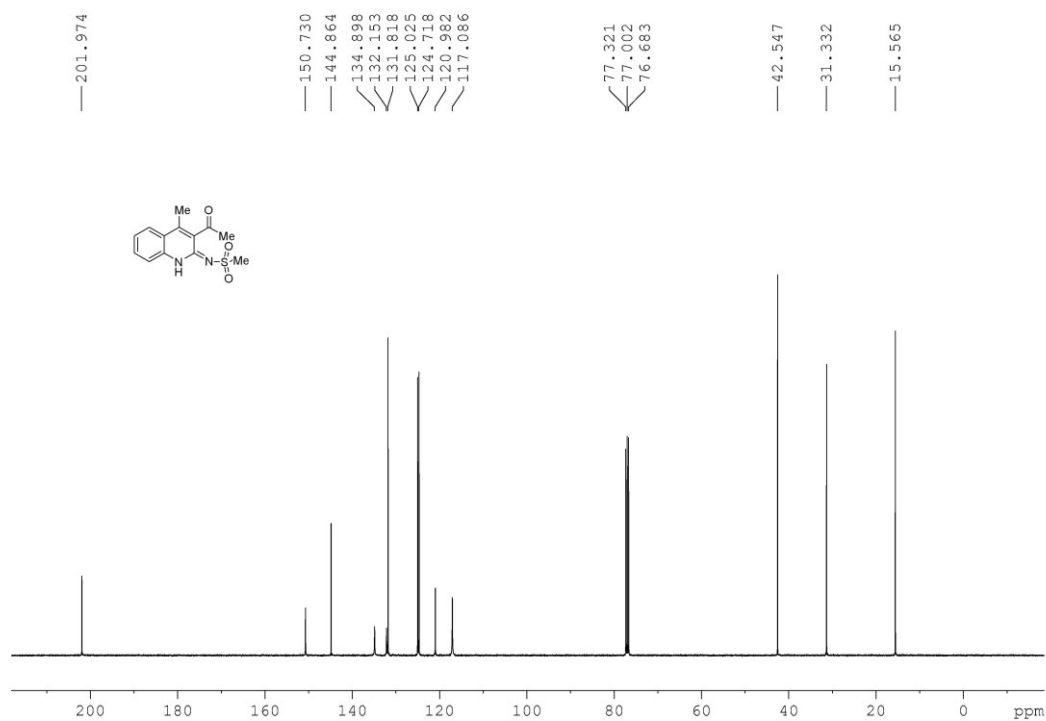

**(E)-N-(3-acetyl-4-methylquinolin-2(1H)-ylidene)ethanesulfonamide (4p)**

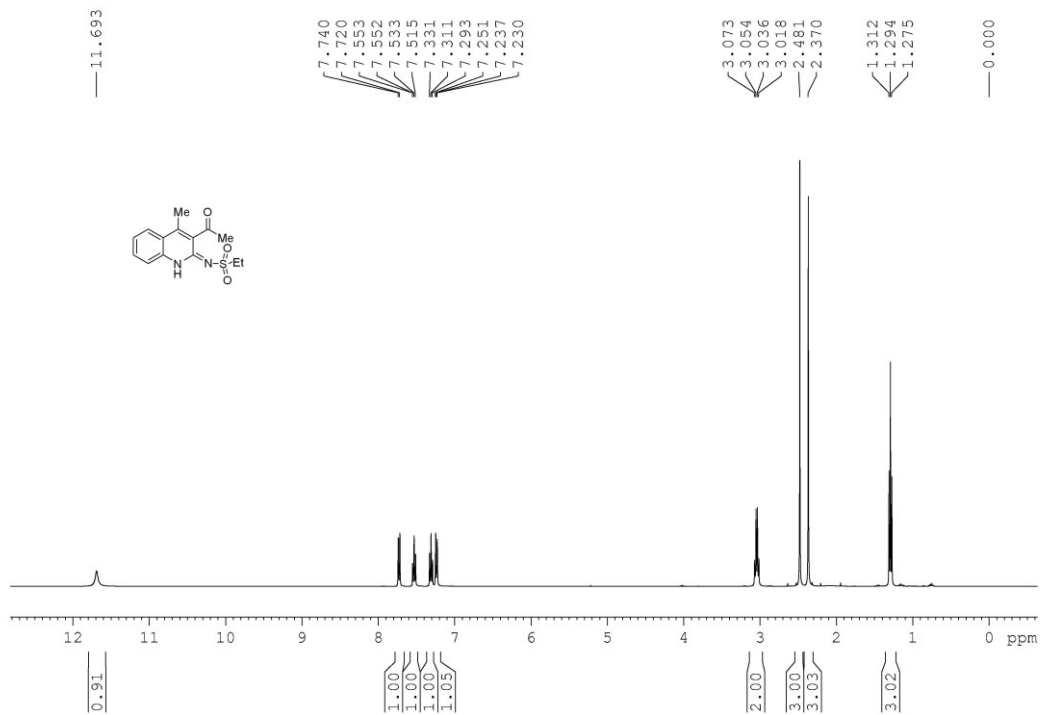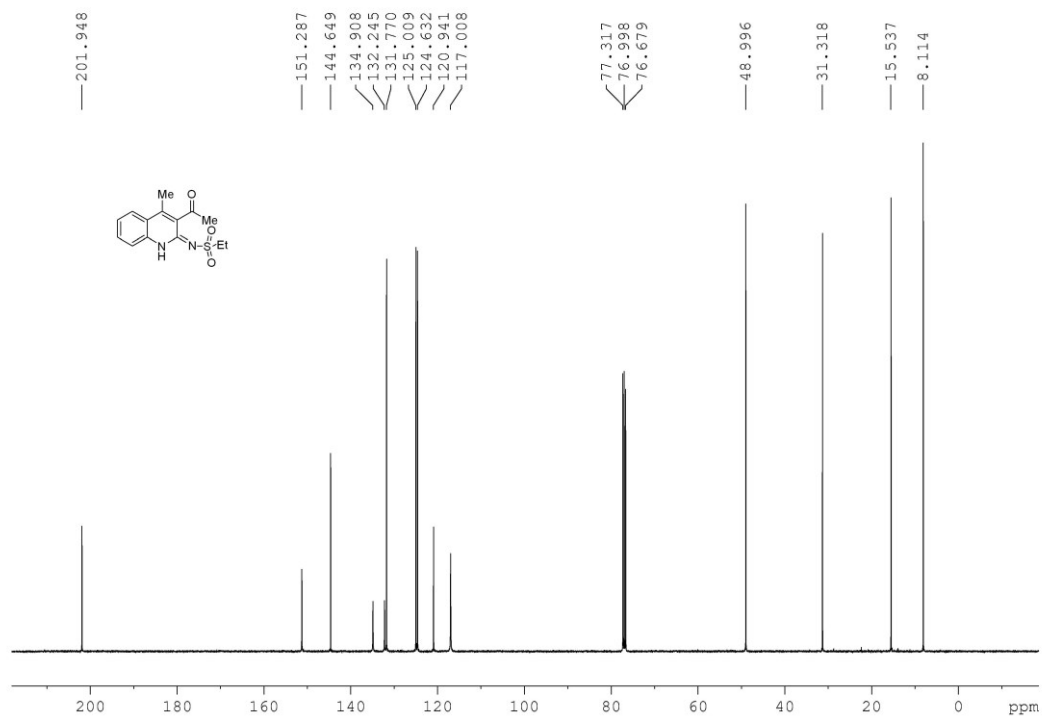

**(E)-N-(3-acetyl-4-methylquinolin-2(1H)-ylidene)propane-1-sulfonamide (4q)**

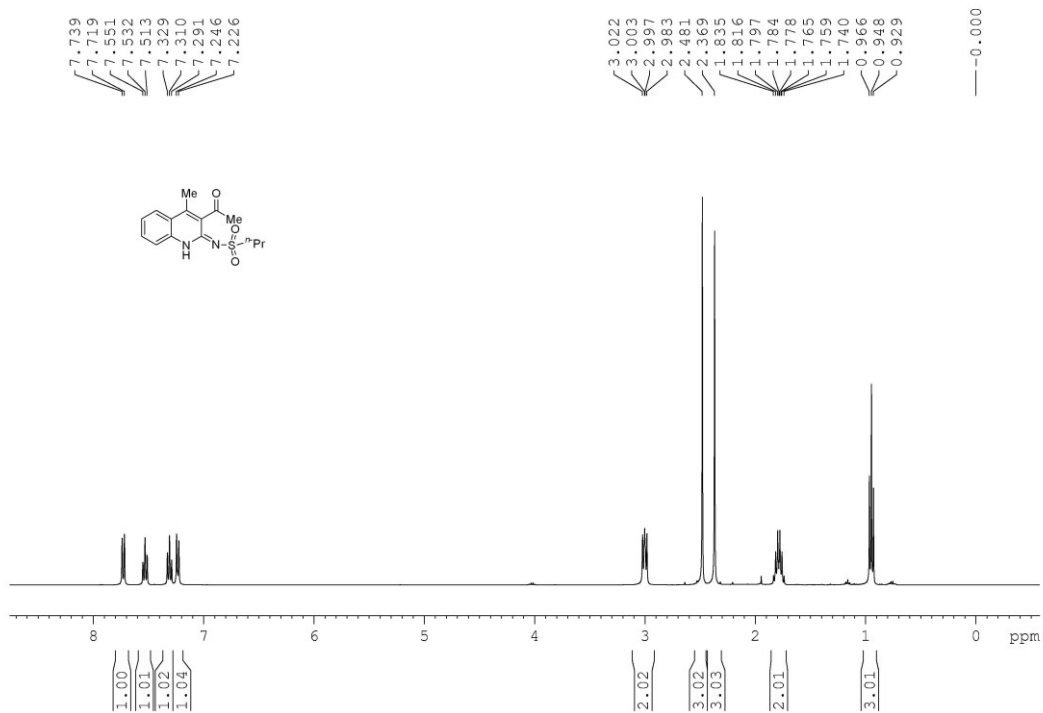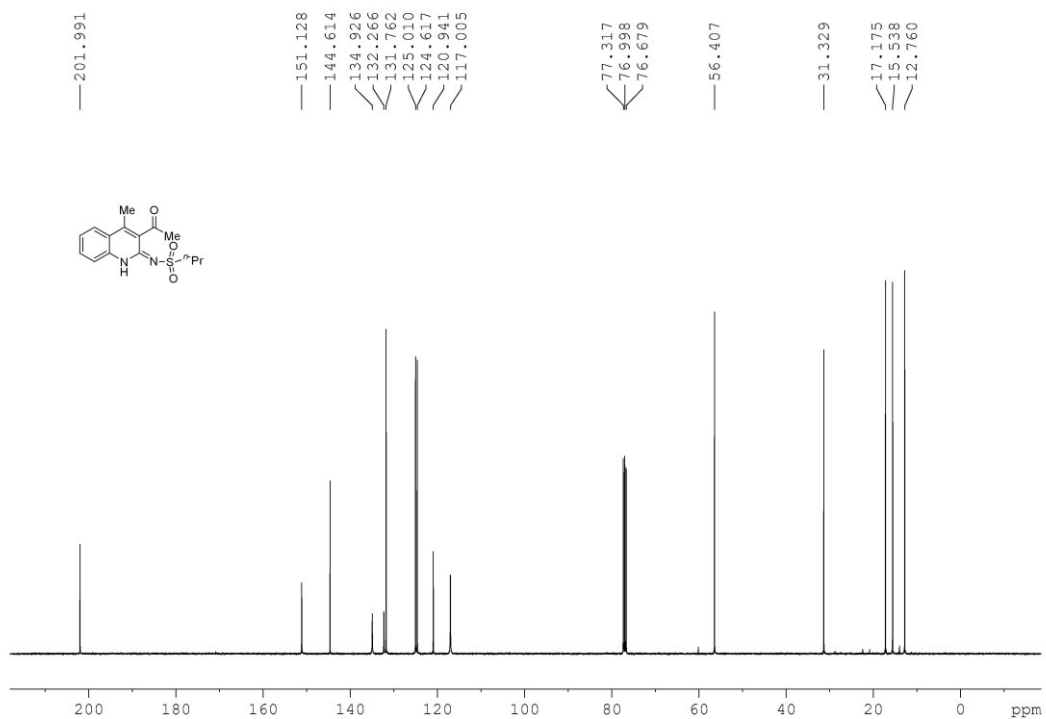

**(E)-N-(3-acetyl-4-methylquinolin-2(1H)-ylidene)butane-1-sulfonamide (4r)**

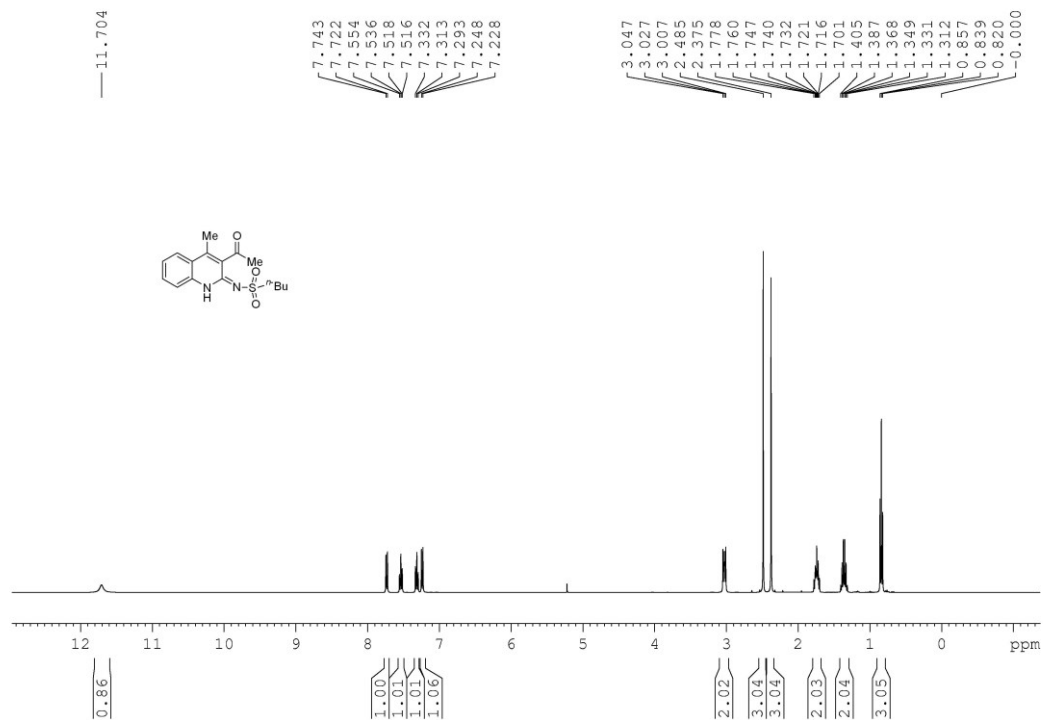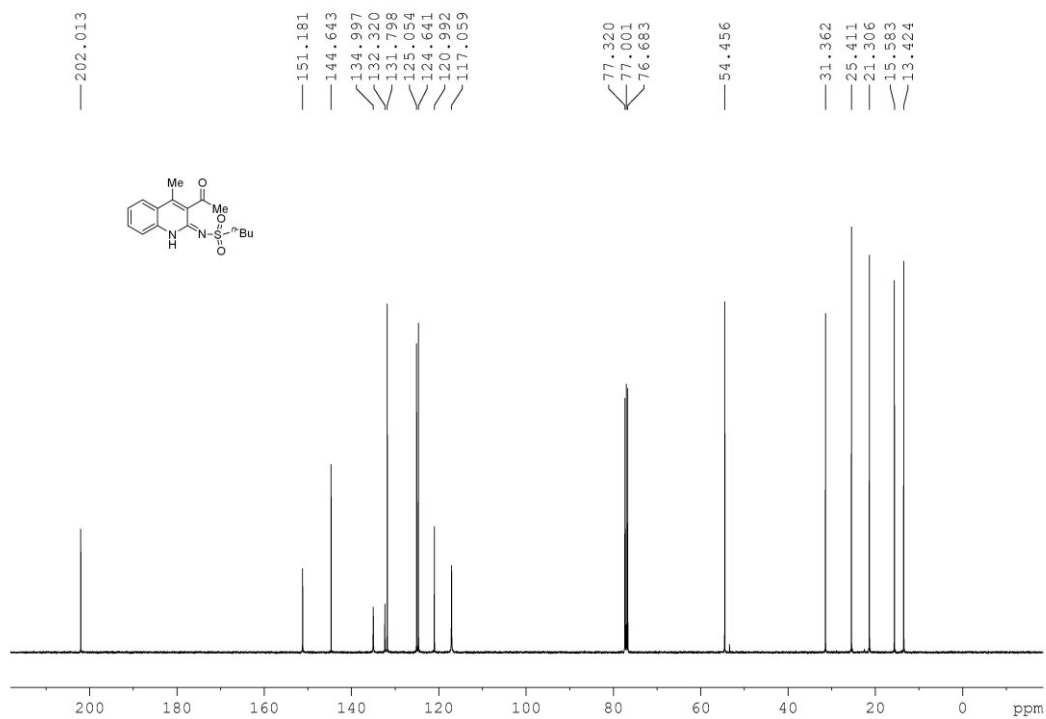

**(E)-N-(3-acetyl-4-methylquinolin-2(1H)-ylidene)-1-phenylmethanesulfonamide**

**(4s)**

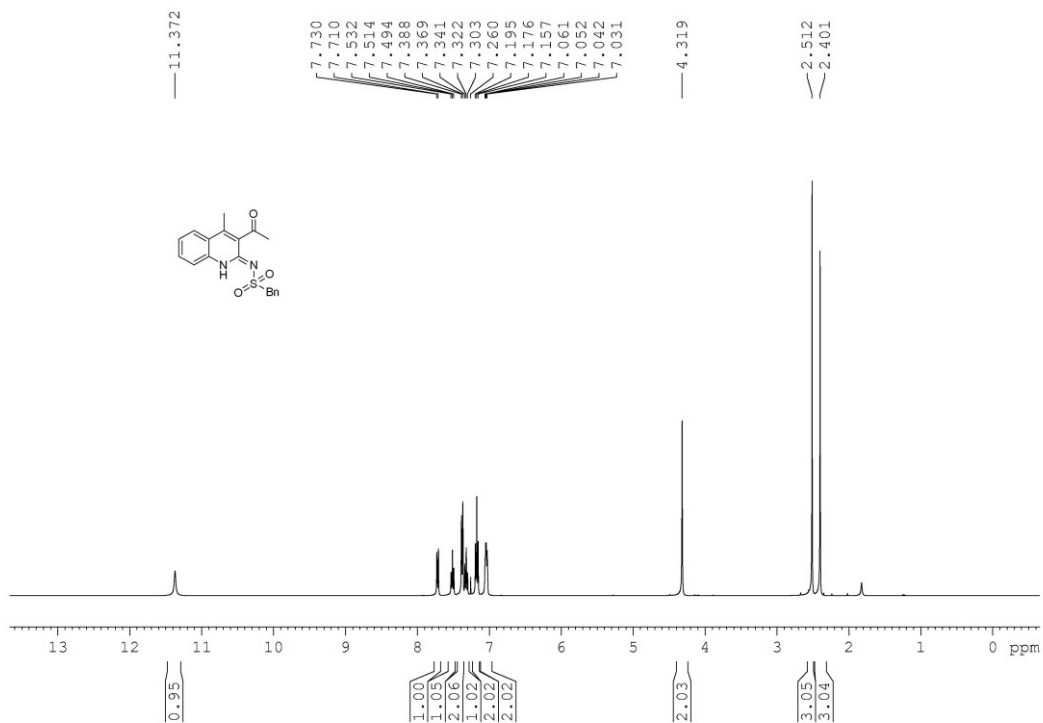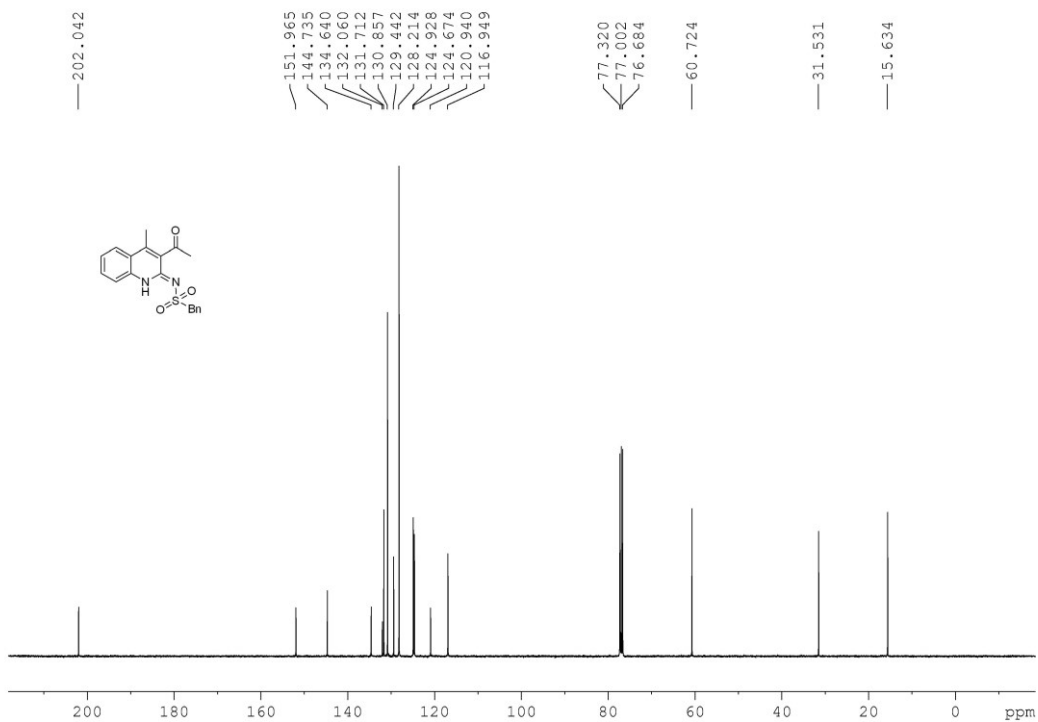

**(E)-N-(3-acetyl-4-methylquinolin-2(1H)-ylidene)-4-chlorobenzenesulfonamide**

**(4t)**

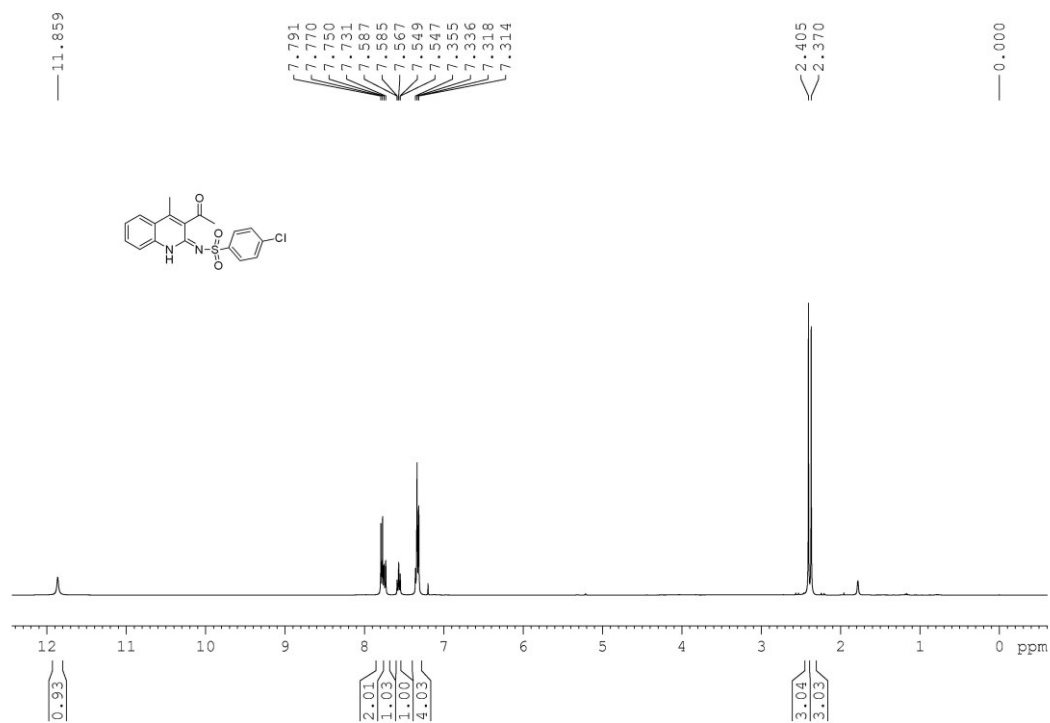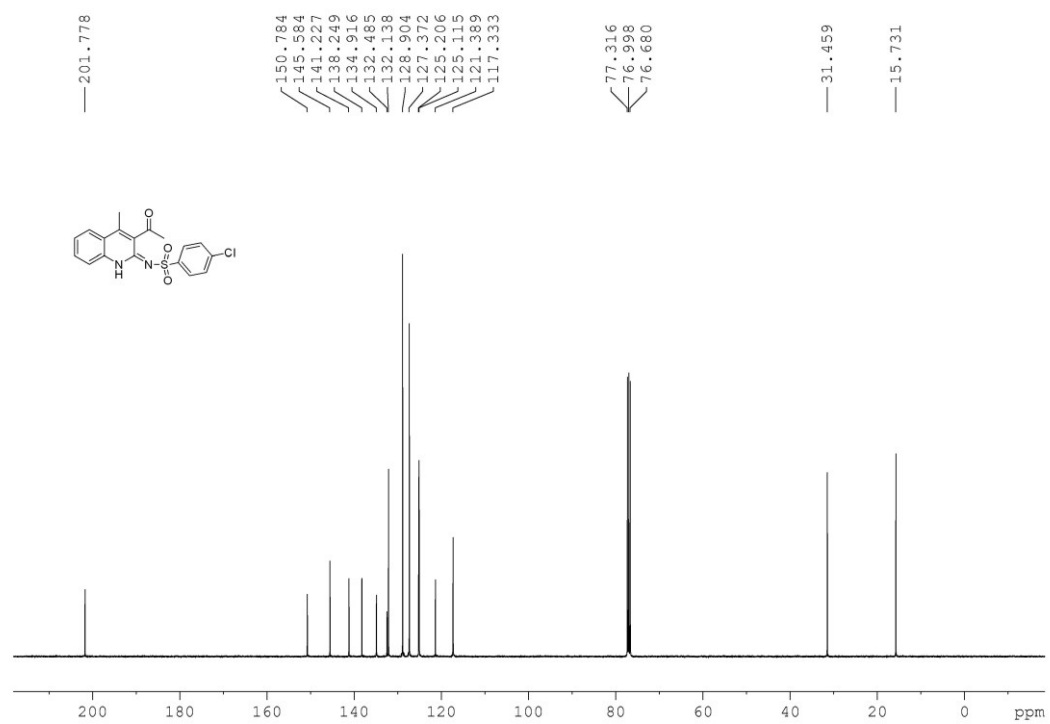

**(E)-N-(3-acetyl-4-methylquinolin-2(1H)-ylidene)-4-bromobenzenesulfonamide**

**(4u)**

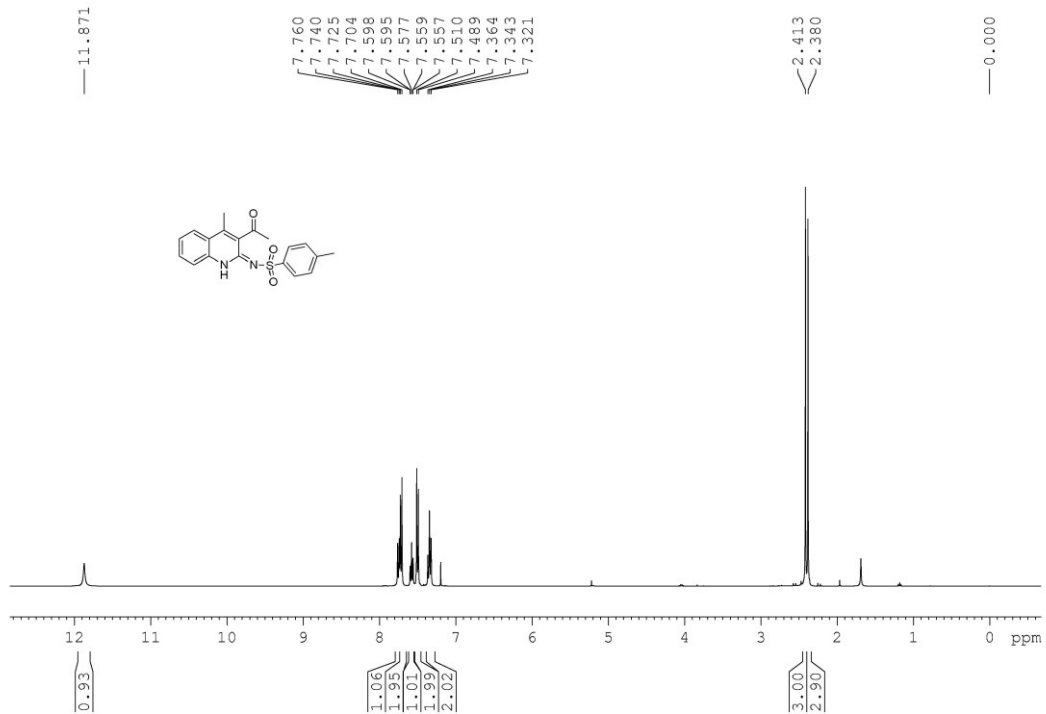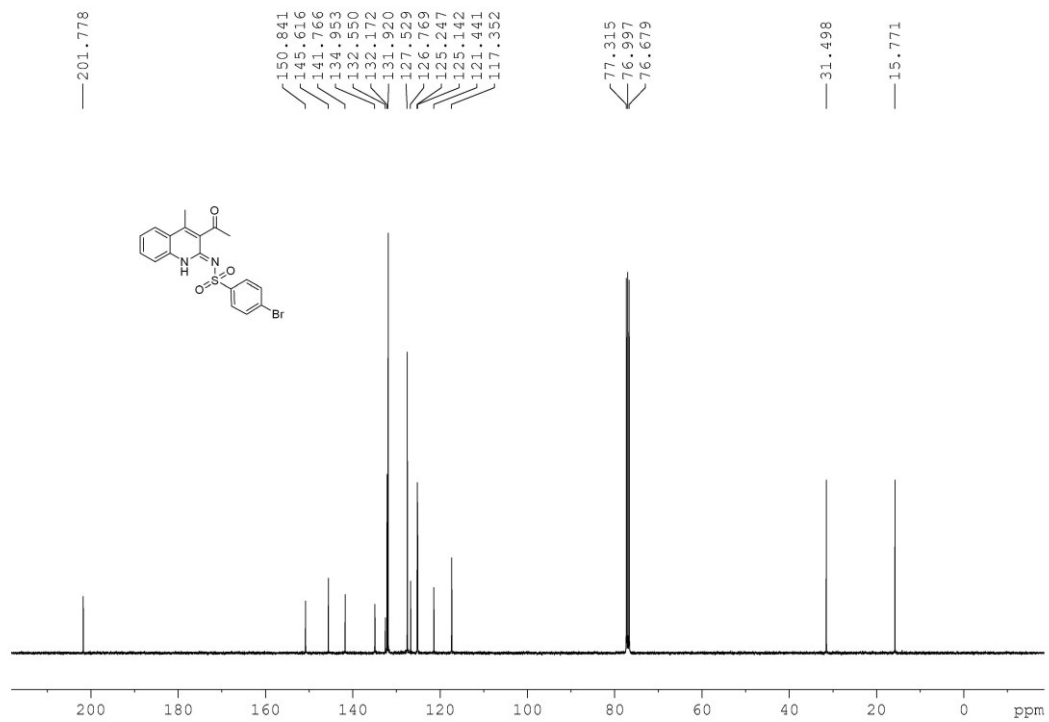



**(E)-N-(3-acetyl-4-methylquinolin-2(1H)-ylidene)-4-methoxybenzenesulfonamide**

**(4v)**

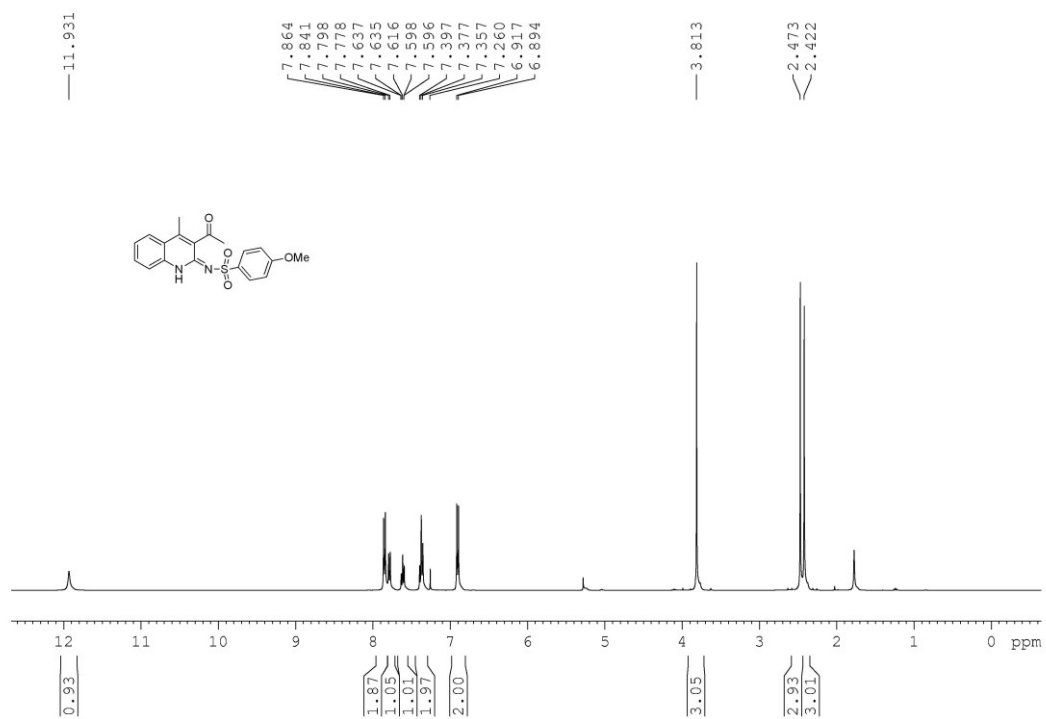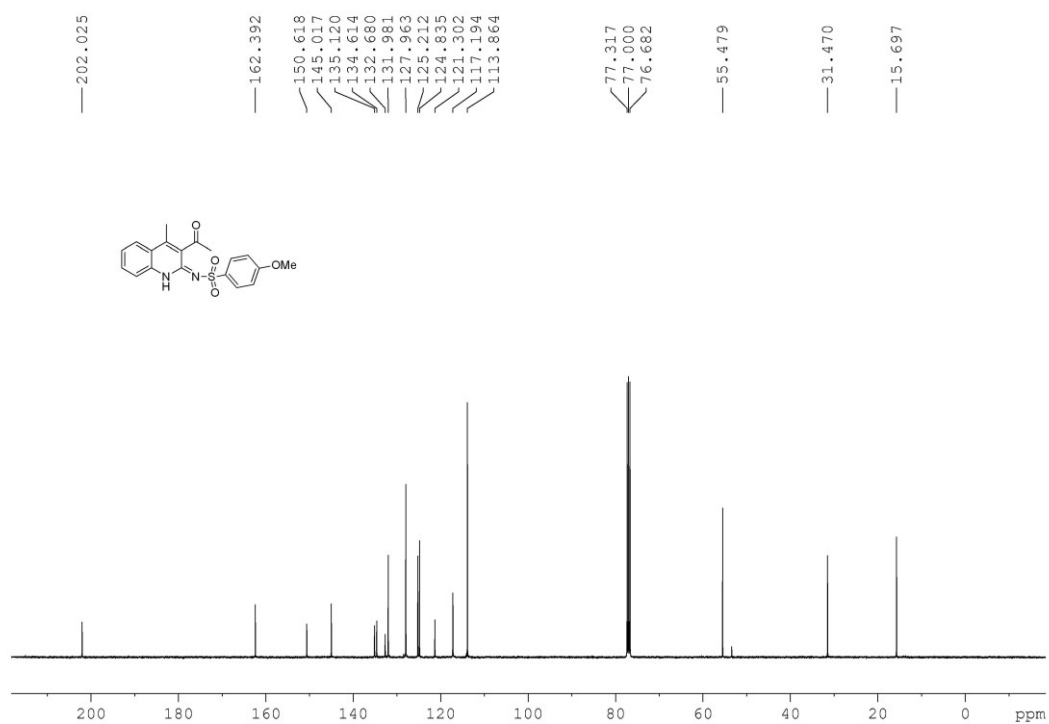

***N*-(3-acetyl-4-hydroxy-1,4-dimethyl-3,4-dihydroquinolin-2(1*H*)-ylidene)-4-methylbenzenesulfonamide (4w)**

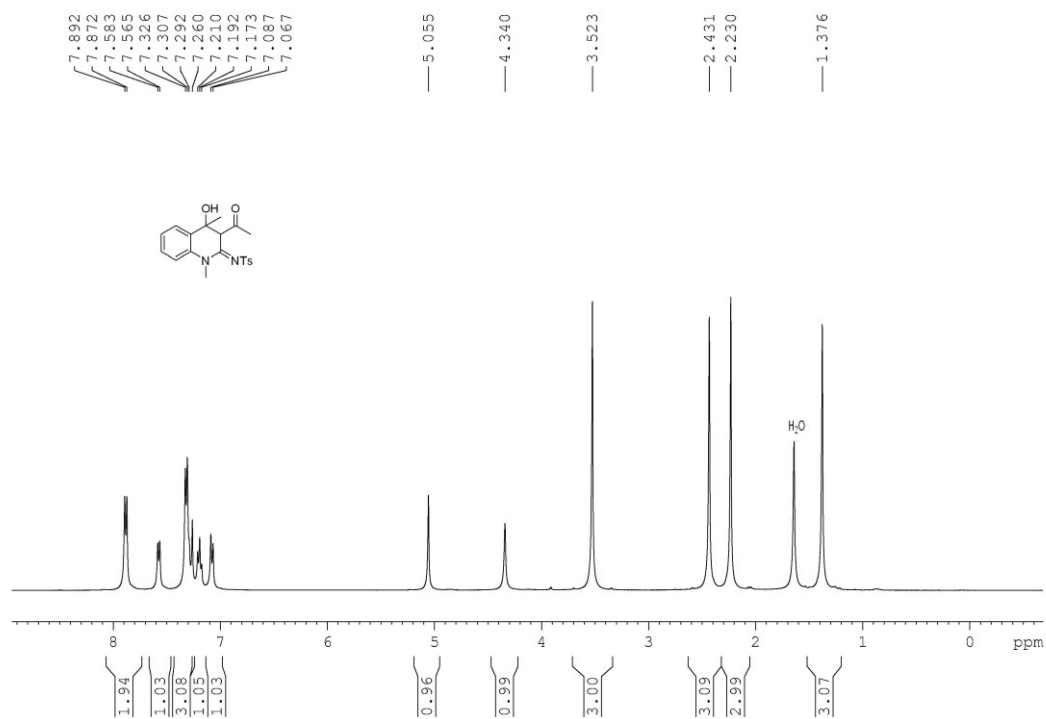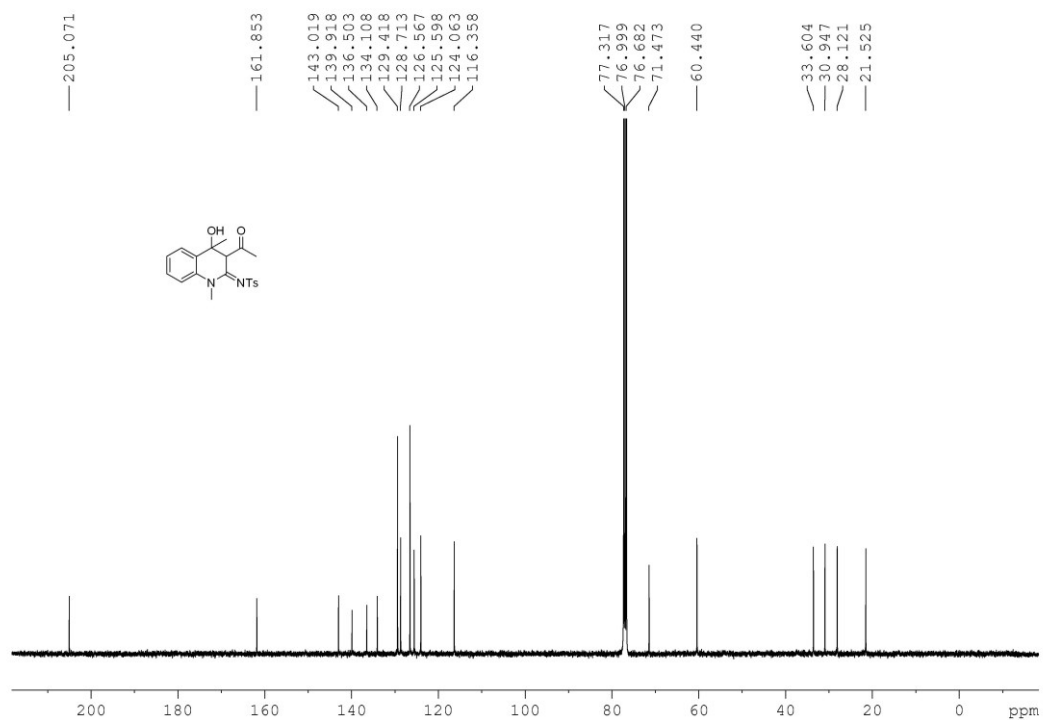

1-(2-amino-4-methylquinolin-3-yl)ethanone (5a)

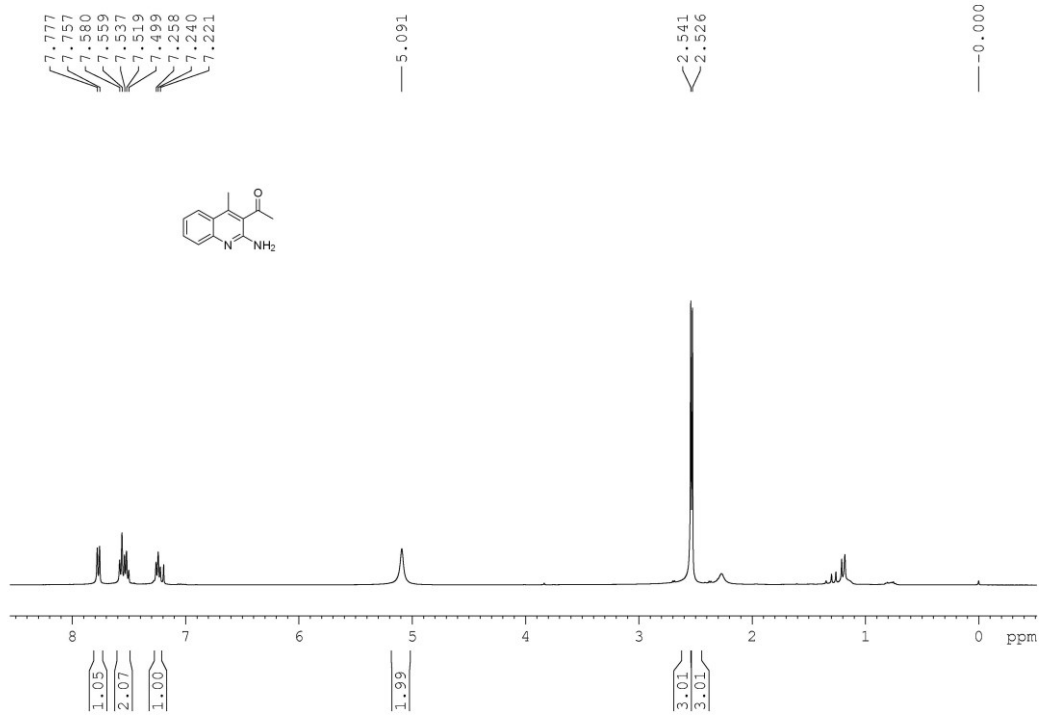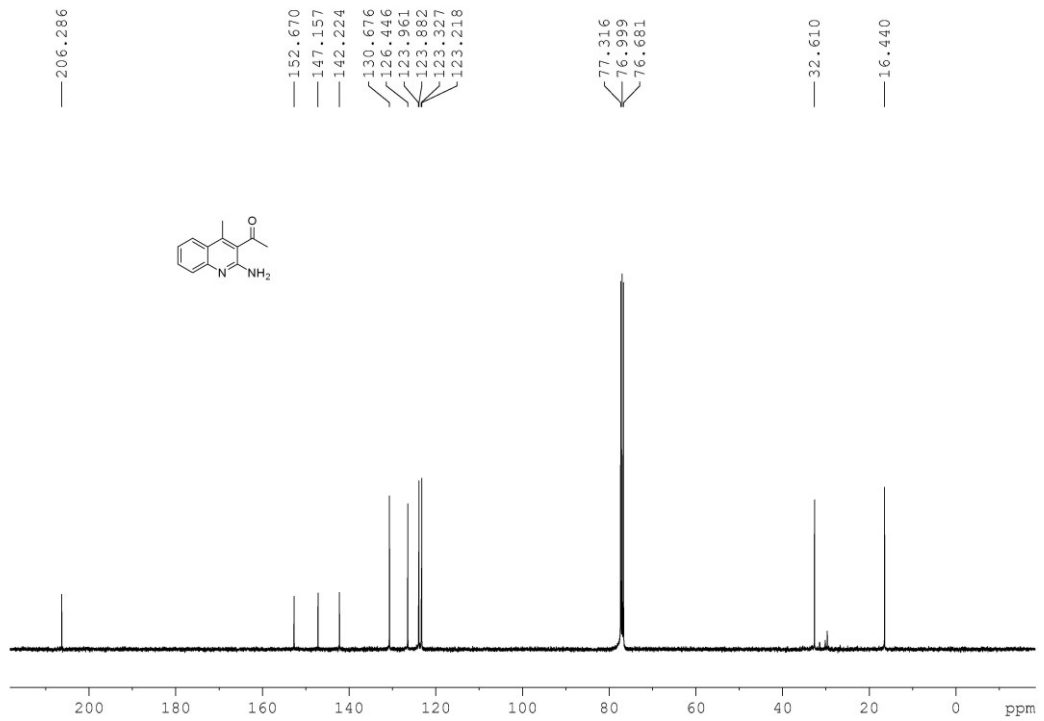

4.1 X-ray Crystallographic Data for Compound **4a** (CCDC deposition number 2092343)

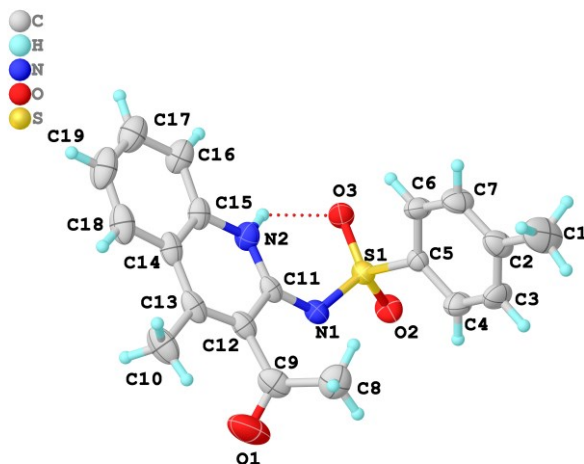

Bond precision: C-C = 0.0043 Å

Wavelength=0.71073

Cell: a=7.7587(5) b=18.0168(12) c=19.7560(13)  
 alpha=104.844(2) beta=98.140(2) gamma=92.385(2)  
 Temperature: 273 K

|                        | Calculated      | Reported        |
|------------------------|-----------------|-----------------|
| Volume                 | 2633.8(3)       | 2633.8(3)       |
| Space group            | P -1            | P -1            |
| Hall group             | -P 1            | -P 1            |
| Moiety formula         | C19 H18 N2 O3 S | C19 H18 N2 O3 S |
| Sum formula            | C19 H18 N2 O3 S | C19 H18 N2 O3 S |
| Mr                     | 354.41          | 354.41          |
| Dx, g cm <sup>-3</sup> | 1.341           | 1.341           |
| Z                      | 6               | 6               |
| Mu (mm <sup>-1</sup> ) | 0.205           | 0.205           |
| F000                   | 1116.0          | 1116.0          |
| F000'                  | 1117.22         |                 |
| h, k, lmax             | 9, 21, 23       | 9, 21, 23       |
| Nref                   | 9308            | 9293            |
| Tmin, Tmax             | 0.936, 0.987    | 0.691, 0.746    |
| Tmin'                  | 0.905           |                 |

Correction method= # Reported T Limits: Tmin=0.691 Tmax=0.746  
 AbsCorr = MULTI-SCAN

Data completeness= 0.998 Theta(max)= 25.027

R(reflections)= 0.0500( 6099) wR2(reflections)= 0.1243( 9293)

S = 1.026

Npar= 685

SI-28



4.3 X-ray Crystallographic Data for Compound **4w** (CCDC deposition number 2092350)

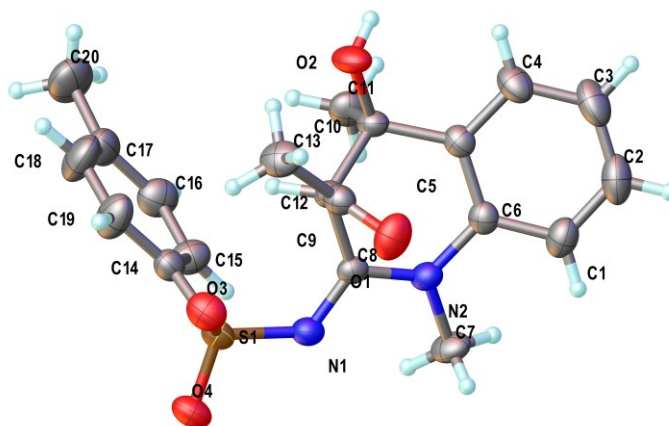

|                                                               |                             |                                 |              |
|---------------------------------------------------------------|-----------------------------|---------------------------------|--------------|
| Bond precision:                                               | C-C = <sup> </sup> 0.0024 Å | Wavelength=0.71073              |              |
| Cell:                                                         | a=33.074 (19)               | b=7.648 (4)                     | c=16.250 (9) |
|                                                               | alpha=90                    | beta=111.766 (6)                | gamma=90     |
| Temperature:                                                  | 296 K                       |                                 |              |
|                                                               | Calculated                  | Reported                        |              |
| Volume                                                        | 3817 (4)                    | 3817 (4)                        |              |
| Space group                                                   | C 2/c                       | C 1 2/c 1                       |              |
| Hall group                                                    | -C 2yc                      | -C 2yc                          |              |
| Moiety formula                                                | C20 H22 N2 O4 S             | C20 H22 N2 O4 S                 |              |
| Sum formula                                                   | C20 H22 N2 O4 S             | C20 H23 N2 O4 S                 |              |
| Mr                                                            | 386.46                      | 387.46                          |              |
| Dx, g cm <sup>-3</sup>                                        | 1.345                       | 1.348                           |              |
| Z                                                             | 8                           | 8                               |              |
| Mu (mm <sup>-1</sup> )                                        | 0.198                       | 0.198                           |              |
| F000                                                          | 1632.0                      | 1640.0                          |              |
| F000'                                                         | 1633.72                     |                                 |              |
| h, k, lmax                                                    | 43, 10, 21                  | 42, 9, 21                       |              |
| Nref                                                          | 4481                        | 4399                            |              |
| Tmin, Tmax                                                    | 0.972, 0.980                | 0.625, 0.746                    |              |
| Tmin'                                                         | 0.965                       |                                 |              |
| Correction method= # Reported T Limits: Tmin=0.625 Tmax=0.746 |                             |                                 |              |
| AbsCorr = MULTI-SCAN                                          |                             |                                 |              |
| Data completeness=                                            | 0.982                       | Theta(max)= 27.722              |              |
| R(reflections)=                                               | 0.0391( 3708)               | wR2(reflections)= 0.1114( 4399) |              |
| S =                                                           | 1.036                       | Npar= 249                       |              |
